# Supplementary material for: pH-Dependent absorption spectrum of oxyluciferin analogues in the active site of firefly luciferase
Source: Royal Society of Chemistry journal article supplement (doi:10.1039/d0cp02514c), 2020-01-01
Supplement: d0cp02514c1.pdf [file d0cp02514c1.pdf]

# Supplementary Information to "pH-dependent absorption spectrum of oxyluciferin analogues in the active site of firefly luciferase"

Nuno Manuel de Almeida Barbosa\*   Pauline Gosset†   Eléonore Réal†   Vincent Ledentu\*  
Pascal Didier†   Nicolas Ferre‡

## 1 CpHMD oxyluciferin analogue structure and AMP parameters

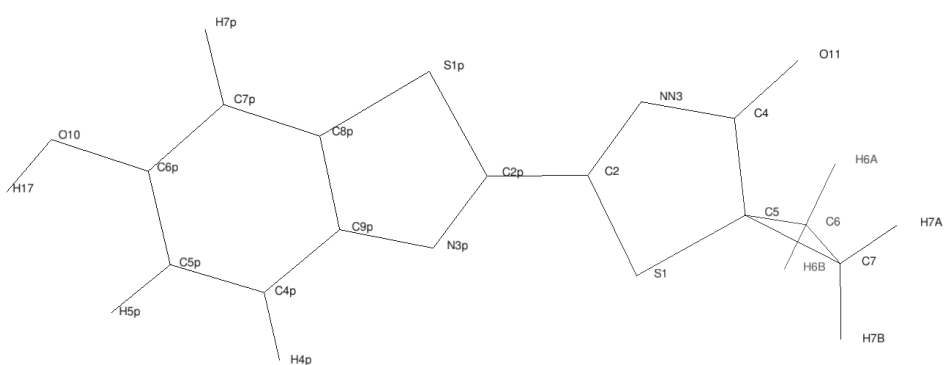

Figure S1: Structure and atom labels of the phenol-keto analogue

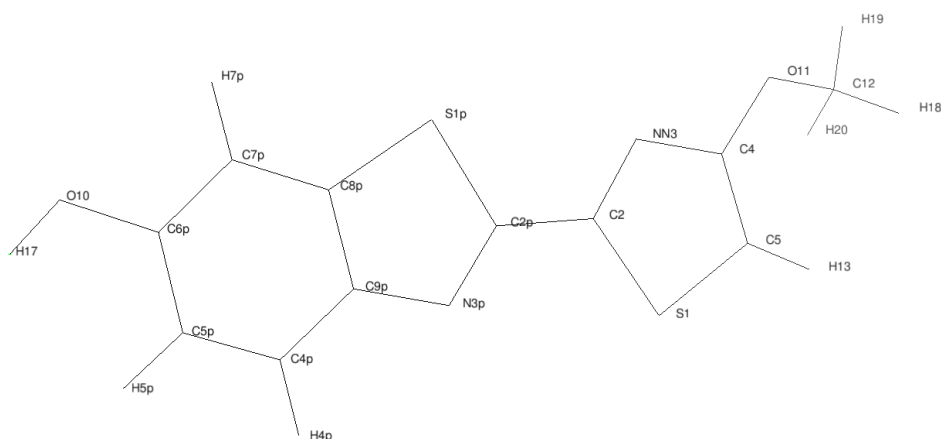

Figure S2: Structure and atom labels of the phenol-methoxy analogue

\* Aix-Marseille Univ, CNRS, ICR, Marseille, France

† Université de Strasbourg, CNRS, Laboratoire de Bioimagerie et Pathologies UMR 7021, 67034 Strasbourg, France

‡ Corresponding author: nicolas.ferre@univ-amu.fr

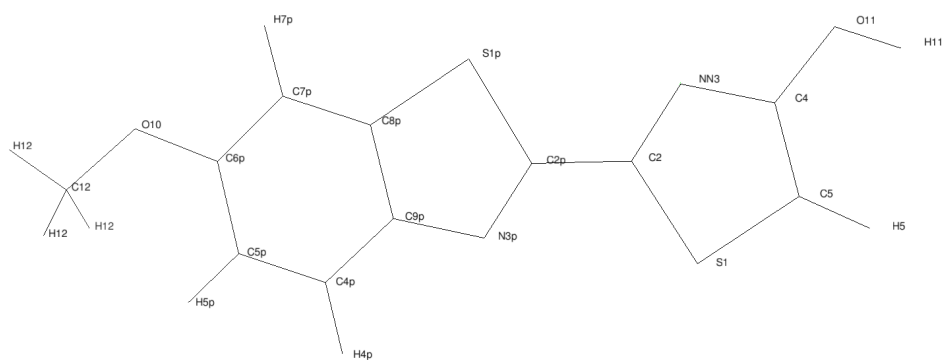

Figure S3: Structure and atom labels of the methoxy-enol analogue

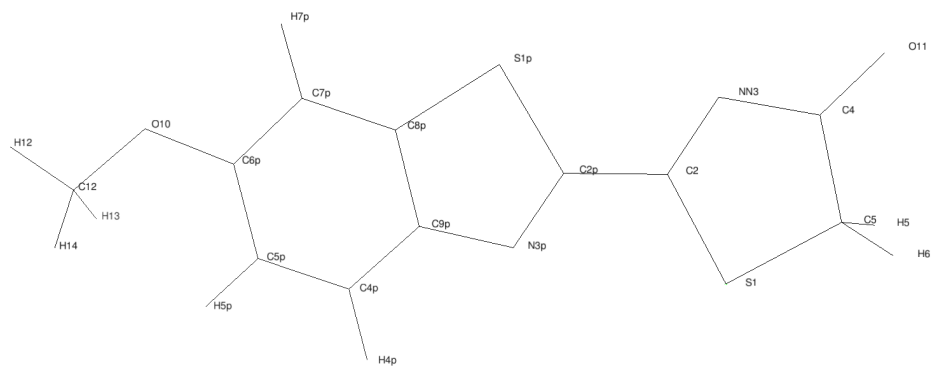

Figure S4: Structure and atom labels of the methoxy-keto analogue

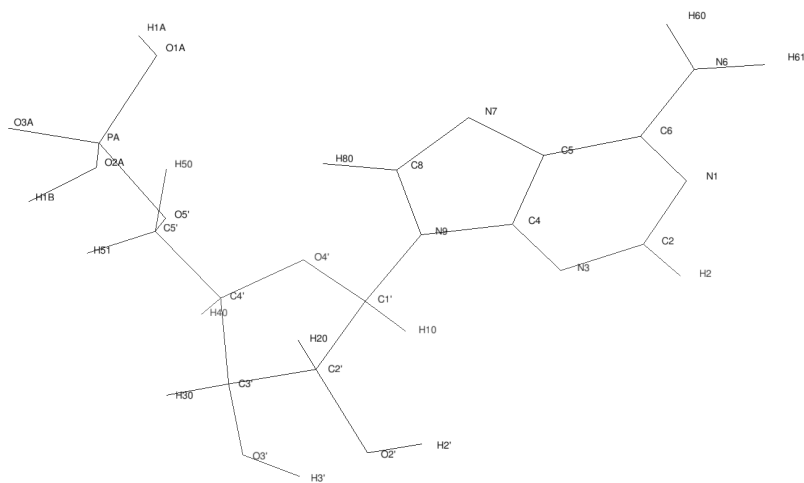

Figure S5: Structure and atom labels of the AMP1 model (first deprotonation of AMP)

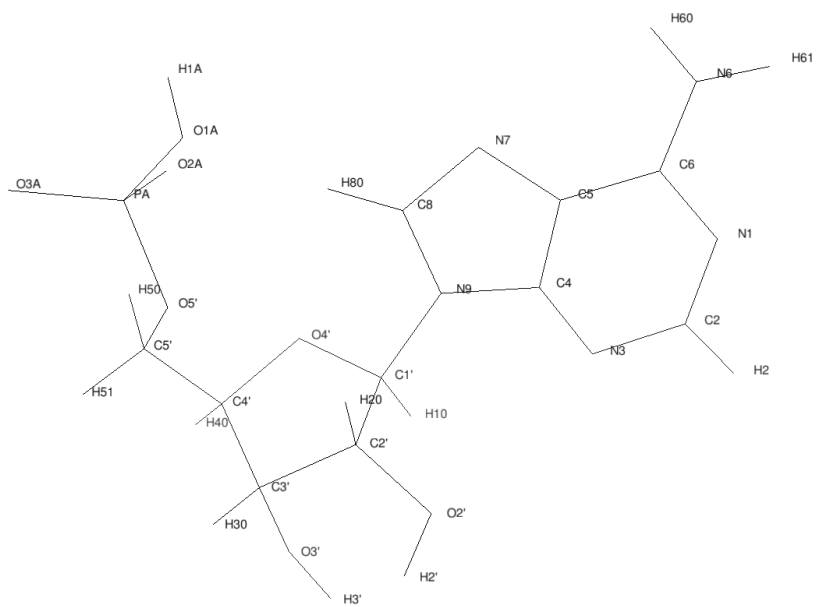

Figure S6: Structure and atom labels of the AMP2 model (second deprotonation of AMP)

Table S1: Atomic partial charges of the phenol-keto analogue

| atom | protonated | deprotonated |
|------|------------|--------------|
| NN3  | -0.5932    | -0.6446      |
| C4   | 0.8344     | 0.7807       |
| O11  | -0.5635    | -0.6072      |
| C5   | -0.0814    | 0.0448       |
| C6   | -0.2515    | -0.3077      |
| H6A  | 0.1577     | 0.1499       |
| H6B  | 0.1577     | 0.1499       |
| C7   | -0.2515    | -0.3077      |
| H7A  | 0.1577     | 0.1499       |
| H7B  | 0.1577     | 0.1499       |
| S1   | -0.1109    | -0.2254      |
| C2   | 0.2919     | 0.3447       |
| C2p  | 0.3415     | 0.1142       |
| N3p  | -0.5195    | -0.4196      |
| C9p  | 0.3451     | 0.2867       |
| C4p  | -0.1860    | -0.2457      |
| H4p  | 0.1960     | 0.1709       |
| C5p  | -0.3819    | -0.3617      |
| H5p  | 0.1872     | 0.1489       |
| C6p  | 0.4446     | 0.7181       |
| O10  | -0.6465    | -0.7085      |
| H17  | 0.4639     | 0.0000       |
| C7p  | -0.3674    | -0.6176      |
| H7p  | 0.2733     | 0.2418       |
| C8p  | -0.0056    | 0.1497       |
| S1p  | -0.0513    | -0.1544      |



Table S2: Atomic partial charges of the phenol-methoxy analogue

| atom | phenol  | phenolate |
|------|---------|-----------|
| NN3  | -0.5250 | -0.5855   |
| C4   | 0.6718  | 0.6792    |
| O11  | -0.4096 | -0.4232   |
| C12  | 0.1013  | 0.1402    |
| H18  | 0.0391  | 0.0174    |
| H19  | 0.0391  | 0.0174    |
| H20  | 0.0391  | 0.0174    |
| C5   | -0.5406 | -0.5802   |
| H13  | 0.2938  | 0.2781    |
| S1   | 0.0203  | -0.0756   |
| C2   | 0.2730  | 0.3540    |
| C2p  | 0.2869  | 0.1428    |
| N3p  | -0.5460 | -0.4869   |
| C9p  | 0.4151  | 0.2888    |
| C4p  | -0.2926 | -0.2536   |
| H4p  | 0.2057  | 0.1666    |
| C5p  | -0.2552 | -0.3842   |
| H5p  | 0.1984  | 0.1462    |
| C6p  | 0.4033  | 0.6950    |
| O10  | -0.5944 | -0.7375   |
| H17  | 0.4237  | 0.0000    |
| C7p  | -0.4818 | -0.6303   |
| H7p  | 0.2684  | -0.2411   |
| C8p  | 0.0385  | 0.1528    |
| S1p  | -0.0742 | -0.1801   |

Table S3: Atomic partial charges of the methoxy-enol analogue

| atom | protonated | deprotonated |
|------|------------|--------------|
| NN3  | -0.3704    | -0.4632      |
| C4   | 0.5054     | 0.6869       |
| O11  | -0.5742    | -0.7701      |
| H11  | 0.4222     | 0.0000       |
| C5   | -0.5174    | -0.6080      |
| H5   | 0.2756     | 0.2309       |
| S1   | 0.0433     | -0.1096      |
| C2   | 0.2372     | 0.2203       |
| C2p  | 0.2545     | 0.3460       |
| N3p  | -0.5102    | -0.6196      |
| C9p  | 0.3294     | 0.4284       |
| C4p  | -0.2849    | -0.3514      |
| H4p  | 0.2075     | 0.2073       |
| C5p  | -0.2802    | -0.2772      |
| H5p  | 0.1712     | 0.1615       |
| C6p  | 0.4582     | 0.4052       |
| O10  | -0.4119    | -0.4200      |
| C12  | 0.0809     | 0.1083       |
| H12  | 0.0532     | 0.0356       |
| H12  | 0.0532     | 0.0356       |
| H12  | 0.0532     | 0.0356       |
| C7p  | -0.5258    | -0.4990      |
| H7p  | 0.2835     | 0.2652       |
| C8p  | 0.1535     | 0.1125       |
| S1p  | -0.1070    | -0.1614      |

Table S4: Atomic partial charges of the methoxy-keto analogue

| atom | charge  |
|------|---------|
| NN3  | -0.4334 |
| C4   | 0.6102  |
| O11  | -0.4764 |
| C5   | -0.0544 |
| H5   | 0.0838  |
| H6   | 0.0838  |
| S1   | -0.1211 |
| C2   | 0.2162  |
| C2p  | 0.2002  |
| N3p  | -0.4278 |
| C9p  | 0.3272  |
| C4p  | -0.2822 |
| H4p  | 0.1873  |
| C5p  | -0.2043 |
| H5p  | 0.1466  |
| C6p  | 0.3657  |
| O10  | -0.3020 |
| C12  | 0.0094  |
| H12  | 0.0648  |
| H13  | 0.0648  |
| H14  | 0.0648  |
| C7p  | -0.4248 |
| H7p  | 0.2370  |
| C8p  | 0.0867  |
| S1p  | -0.0224 |

Table S5: Atomic partial charges of AMP1

| atom | protonated | deprotonated |
|------|------------|--------------|
| O1A  | -0.6321    | -0.7812      |
| H1A  | 0.4654     | 0.4693       |
| PA   | 1.1388     | 1.2882       |
| O2A  | -0.6321    | -0.8252      |
| H1B  | 0.4654     | 0.0000       |
| O3A  | -0.6934    | -0.8252      |
| O5'  | -0.3102    | -0.4252      |
| C5'  | -0.1428    | -0.3227      |
| H50  | 0.1280     | 0.1541       |
| H51  | 0.1280     | 0.1541       |
| C4'  | 0.2779     | 0.6098       |
| H40  | 0.0810     | 0.0210       |
| C3'  | 0.2923     | -0.1131      |
| H30  | 0.0223     | 0.1264       |
| O3'  | -0.7217    | -0.6709      |
| H3   | 0.4598     | 0.4301       |
| C2'  | 0.3076     | 0.2388       |
| H20  | -0.0201    | 0.0693       |
| O2'  | -0.7209    | -0.6803      |
| H2'  | 0.4312     | 0.4220       |
| O4'  | -0.4885    | -0.6094      |
| C1'  | 0.1640     | 0.5023       |
| H10  | 0.0932     | 0.0489       |
| N9   | -0.1443    | -0.3618      |
| C8   | 0.2919     | 0.3900       |
| H80  | 0.1520     | 0.1573       |
| N7   | -0.6252    | -0.6553      |
| C5   | -0.0045    | -0.1813      |
| C6   | 0.7920     | 0.9858       |
| N6   | -0.9613    | -1.0895      |
| H60  | 0.4303     | 0.4551       |
| H61  | 0.4303     | 0.4551       |
| N1   | -0.7806    | -0.9280      |
| C2   | 0.5455     | 0.5836       |
| H2   | 0.0791     | 0.0636       |
| N3   | -0.6936    | -0.8000      |
| C4   | 0.3954     | 0.6446       |

Table S6: Atomic partial charges of AMP2

| atom | protonated | deprotonated |
|------|------------|--------------|
| O1A  | -0.7812    | -0.9493      |
| H1A  | 0.4693     | 0.0000       |
| PA   | 1.2882     | 1.4113       |
| O2A  | -0.8252    | -0.9493      |
| O3A  | -0.8252    | -0.9493      |
| O5'  | -0.4252    | -0.5525      |
| C5'  | -0.3227    | -0.1520      |
| H50  | 0.1541     | 0.1042       |
| H51  | 0.1541     | 0.1042       |
| C4'  | 0.6098     | 0.4956       |
| H40  | 0.0210     | 0.0144       |
| C3'  | -0.1131    | -0.0508      |
| H30  | 0.1264     | 0.1054       |
| O3'  | -0.6709    | -0.6897      |
| H3   | 0.4301     | 0.4171       |
| C2'  | 0.2388     | 0.1866       |
| H20  | 0.0693     | 0.1045       |
| O2'  | -0.6803    | -0.6946      |
| H2'  | 0.4220     | 0.4135       |
| O4'  | -0.6094    | -0.5789      |
| C1'  | 0.5023     | 0.6100       |
| H10  | 0.0489     | 0.0127       |
| N9   | -0.3618    | -0.5616      |
| C8   | 0.3900     | 0.6831       |
| H80  | 0.1573     | 0.0205       |
| N7   | -0.6553    | -0.6693      |
| C5   | -0.1813    | -0.2804      |
| C6   | 0.9858     | 1.0255       |
| N6   | -1.0895    | -1.1068      |
| H60  | 0.4551     | 0.4480       |
| H61  | 0.4551     | 0.4480       |
| N1   | -0.9280    | -0.9676      |
| C2   | 0.5836     | 0.5659       |
| H2   | 0.0636     | 0.0474       |
| N3   | -0.8000    | -0.8124      |
| C4   | 0.6446     | 0.7465       |

## 2 Selected titrating residues

Table S7: This table reports the type and numbering of all titrating residues selected using the iterative approach described in the main text. Of course, the analogue (544th residue) and AMP (545th residue) are included as well. In the first iteration of the selection, only HIS 245, GLU 344, LYS 439, AMP and analogue were considered.

| AMP1+phenol-methoxy | AMP1+phenol-keto | AMP1+methoxy-enol | AMP1+methoxy-keto |
|---------------------|------------------|-------------------|-------------------|
| GLU 83              | GLU 83           | GLU 83            | GLU 83            |
| ASP 107             | CYS 108          | ASP 107           | ASP 107           |
| CYS 108             | LYS 206          | CYS 108           | CYS 108           |
| LYS 206             | HIS 244          | LYS 206           | LYS 206           |
| HIS 244             | HIS 245          | HIS 244           | HIS 244           |
| HIS 245             | GLU 344          | HIS 245           | HIS 245           |
| GLU 311             | LYS 354          | GLU 311           | GLU 311           |
| GLU 344             | ASP 356          | GLU 344           | GLU 344           |
| LYS 354             | ASP 357          | LYS 354           | LYS 354           |
| ASP 357             | HIS 431          | ASP 357           | ASP 357           |
| LYS 439             | LYS 439          | LYS 439           | LYS 439           |
| LYS 443             | LYS 443          | LYS 443           | LYS 443           |
| CYS 447             | CYS 447          | CYS 447           | CYS 447           |

| AMP2+phenol-methoxy | AMP2+phenol-keto | AMP2+methoxy-enol |
|---------------------|------------------|-------------------|
| ASP 107             | CYS 108          | ASP 107           |
| CYS 108             | LYS 206          | CYS 108           |
| LYS 206             | HIS 244          | LYS 206           |
| HIS 244             | HIS 245          | HIS 244           |
| HIS 245             | GLU 344          | HIS 245           |
| GLU 311             | LYS 354          | GLU 311           |
| GLU 344             | ASP 357          | GLU 344           |
| LYS 354             | LYS 364          | LYS 354           |
| ASP 356             | HIS 419          | ASP 356           |
| ASP 422             | HIS 431          | ASP 422           |
| HIS 431             | LYS 439          | HIS 431           |
| LYS 439             | CYS 447          | LYS 439           |
| LYS 443             |                  | LYS 443           |
| CYS 447             |                  | CYS 447           |

### 3 CpHMD-based titration curves

Below are reported all titration curves obtained using CpHMD. Some  $pK_a$  values are obviously not fully converged, especially when Hill factors  $n$  are significantly far from 1.0. Nevertheless, CpHMD trajectories were not meant to produce accurate  $pK_a$  values, but rather to sample the most probable protonation microstates, suitable for tens of thousands of QM/MM calculations.

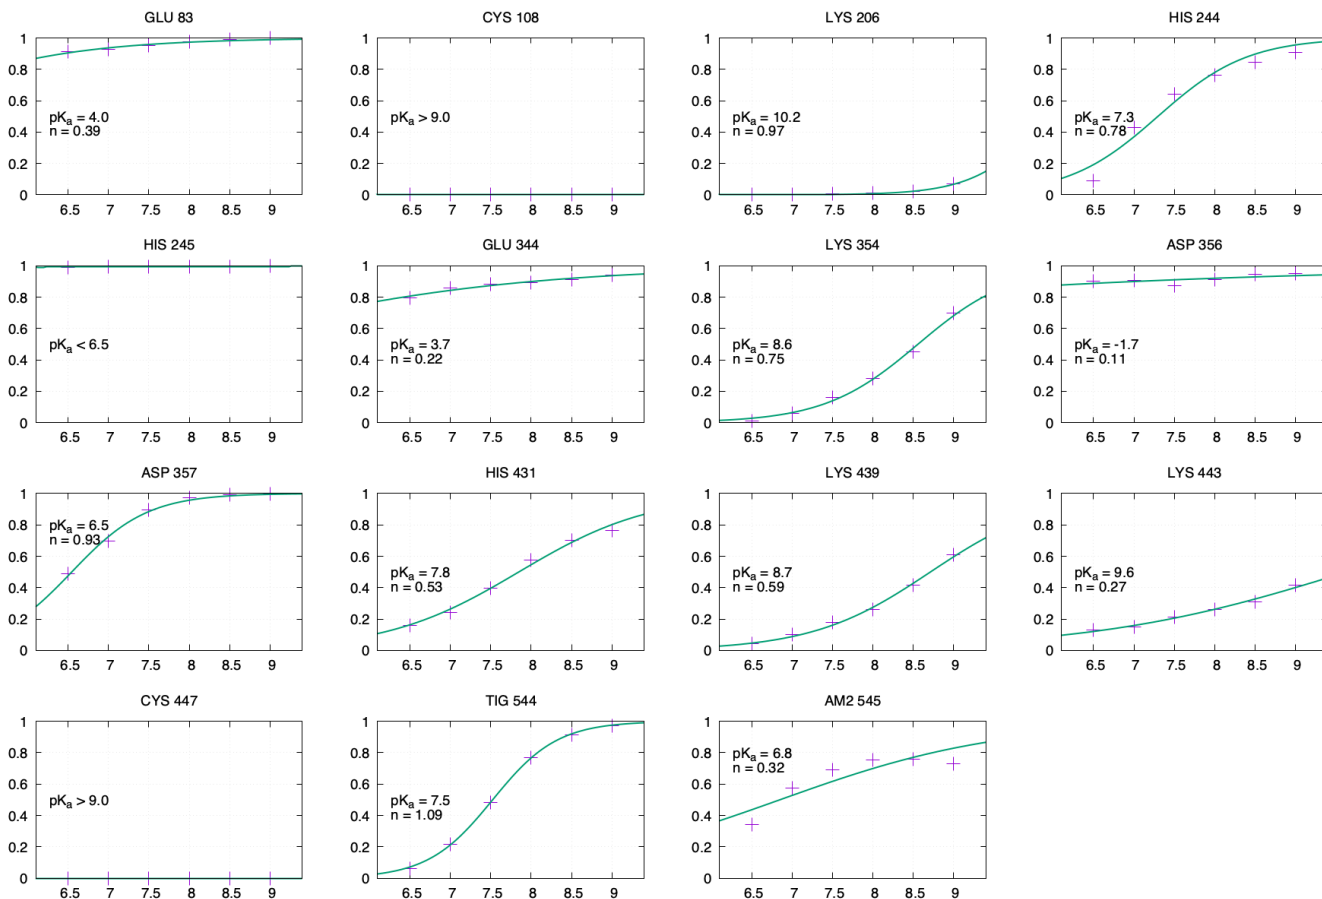

Figure S7: AMP1 (indicated as AM2) + phenol-keto (indicated as TIG 544)

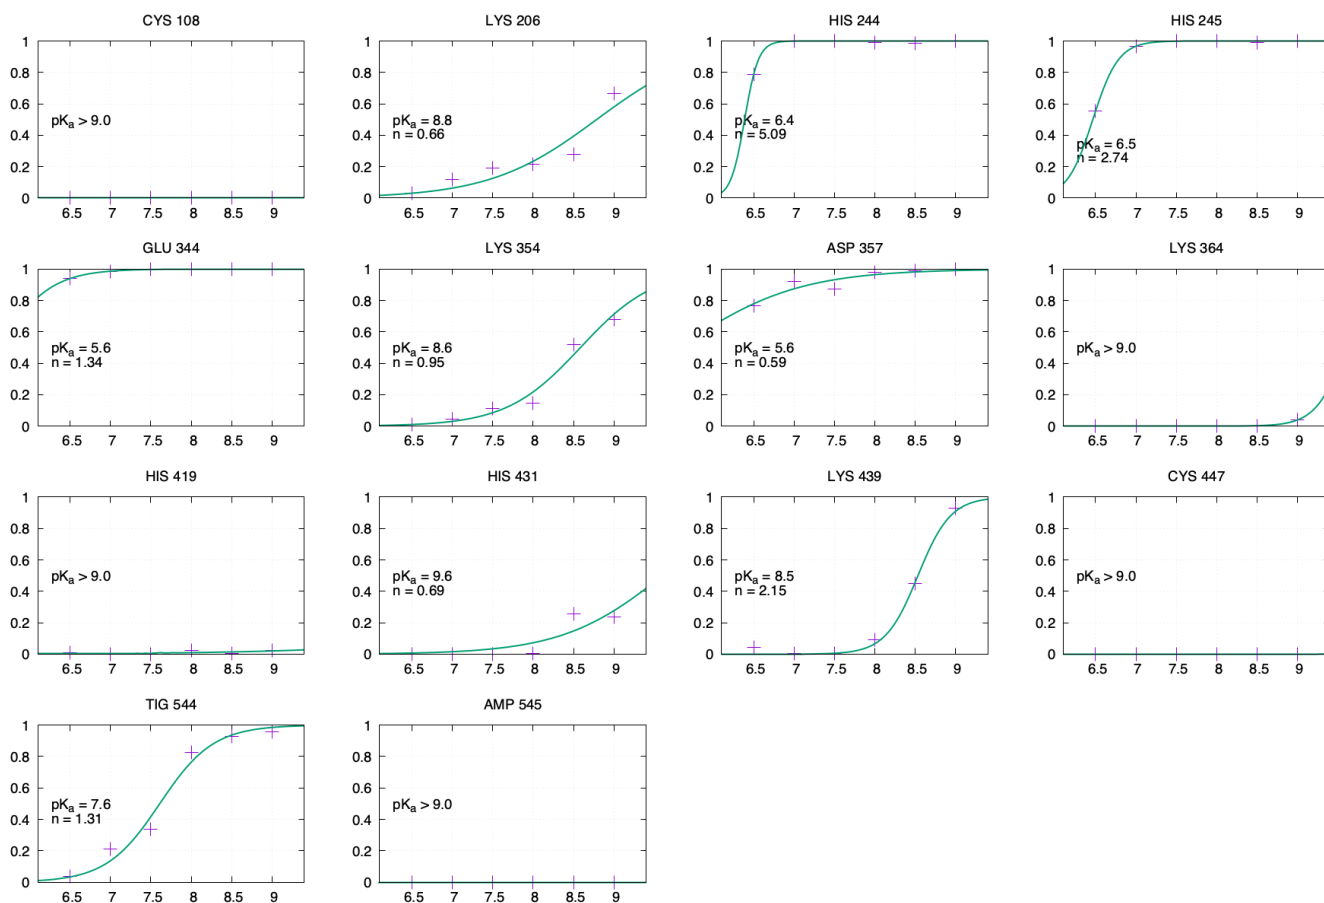

Figure S8: AMP2 (indicated as AMP) + phenol-keto (indicated as TIG 544)

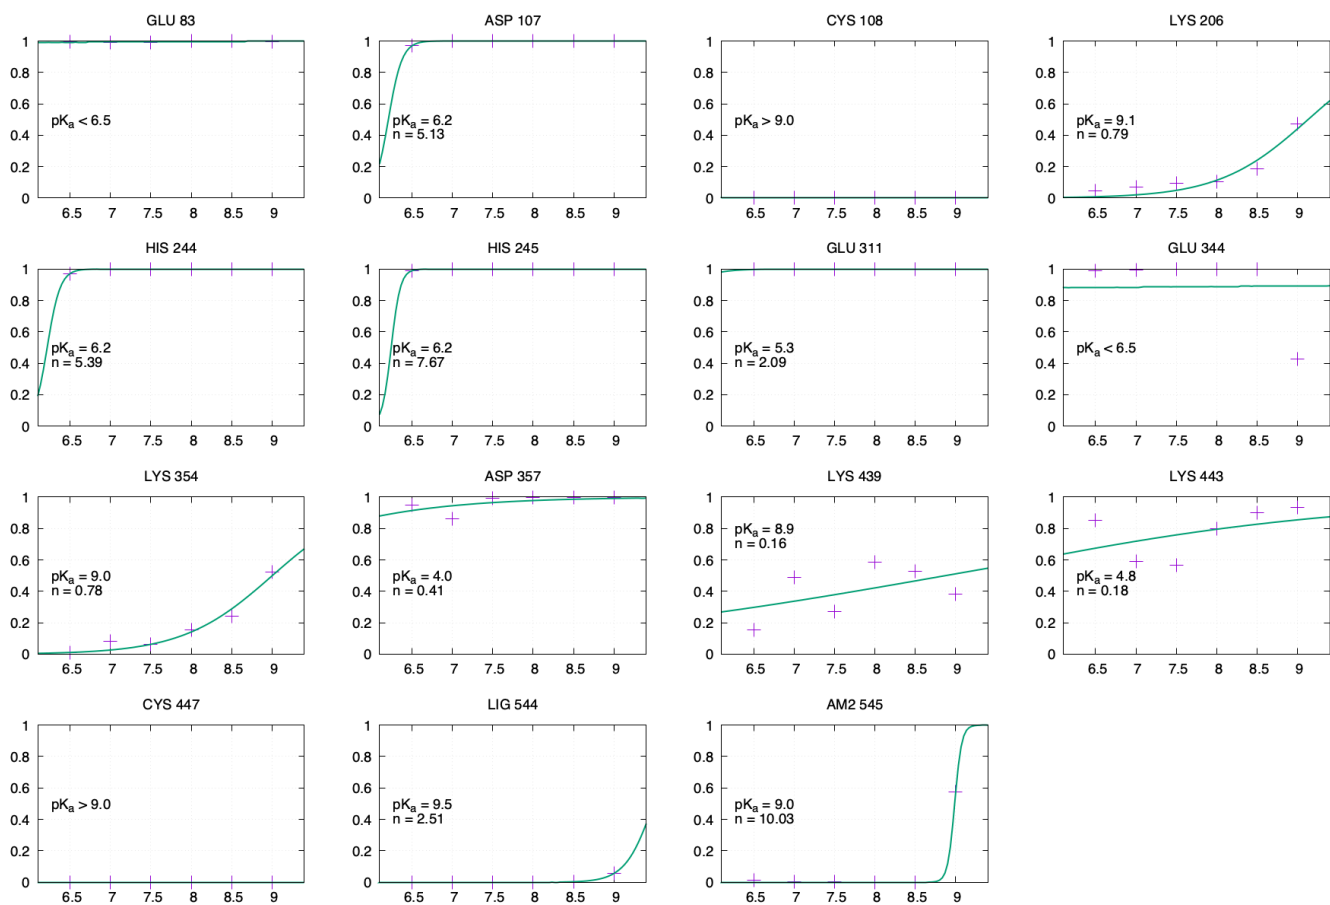

Figure S9: AMP1 (indicated as AM2) + phenol-methoxy (indicated as LIG 544)



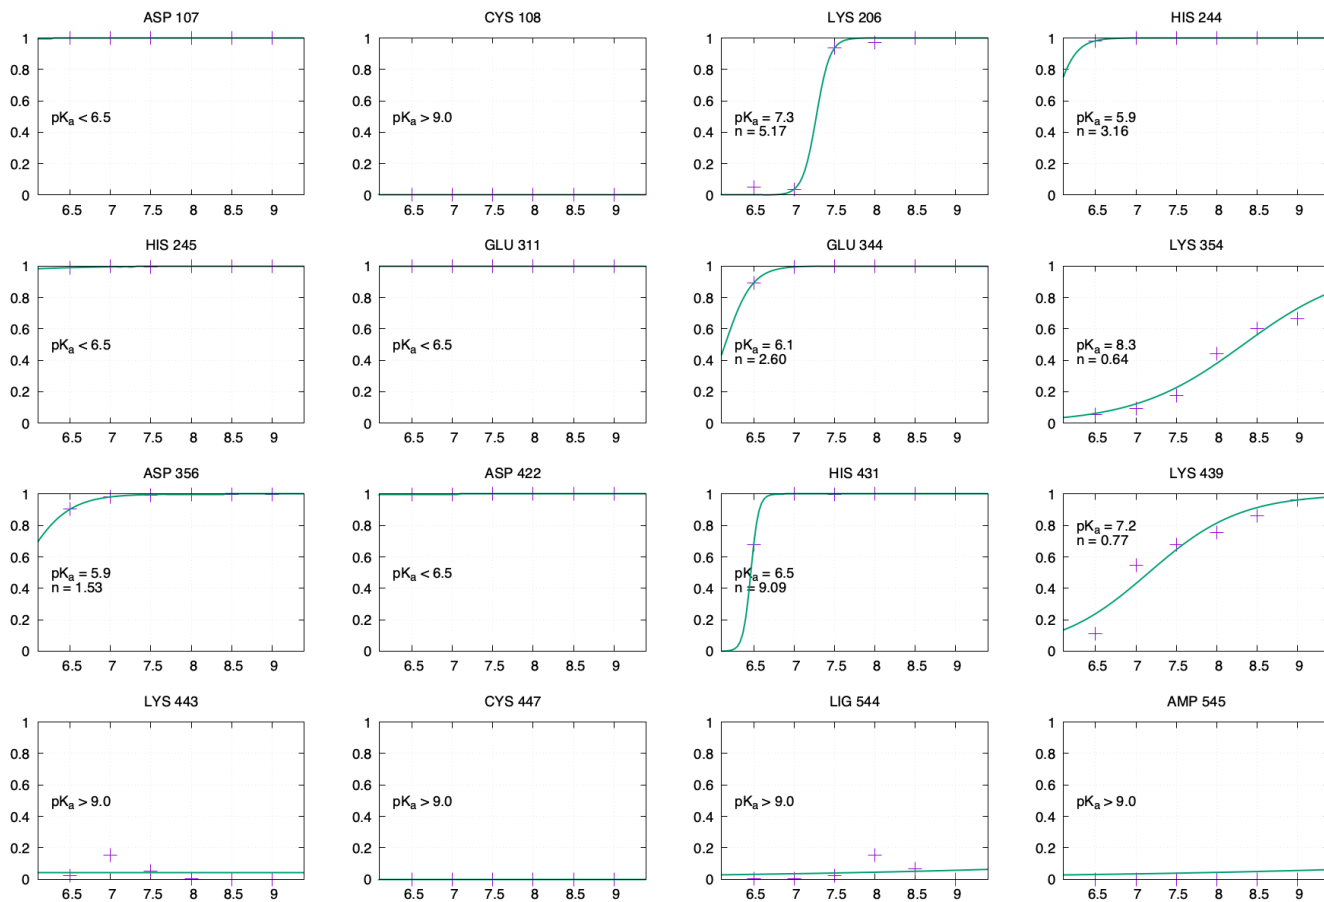

Figure S10: AMP2 (indicated as AMP) + phenol-methoxy (indicated as LIG 544)

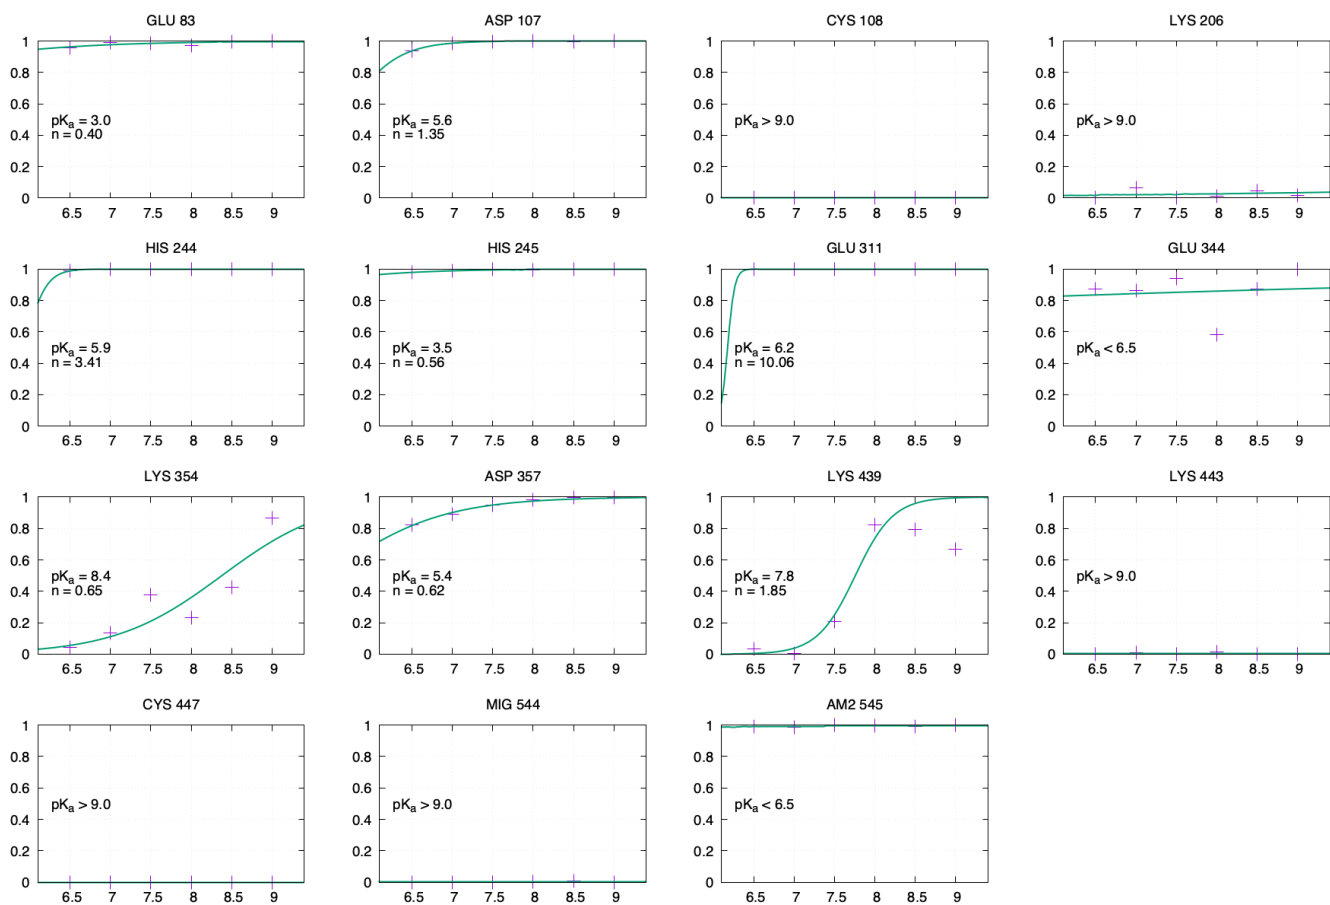

Figure S11: AMP1 (indicated as AM2) + methoxy-enol (indicated as MIG 544)

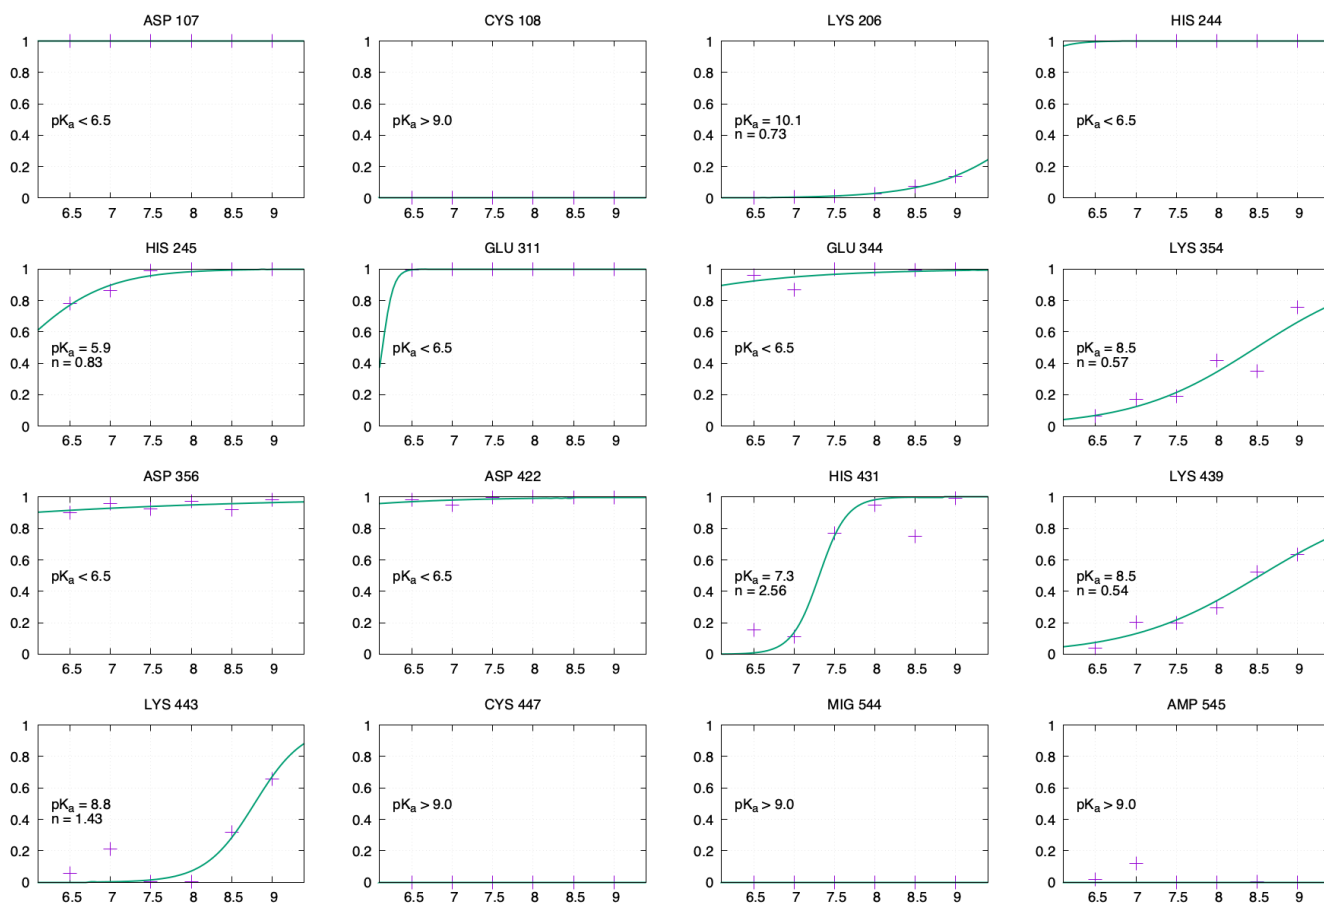

Figure S12: AMP2 (indicated as AMP) + methoxy-enol (indicated as MIG 544)

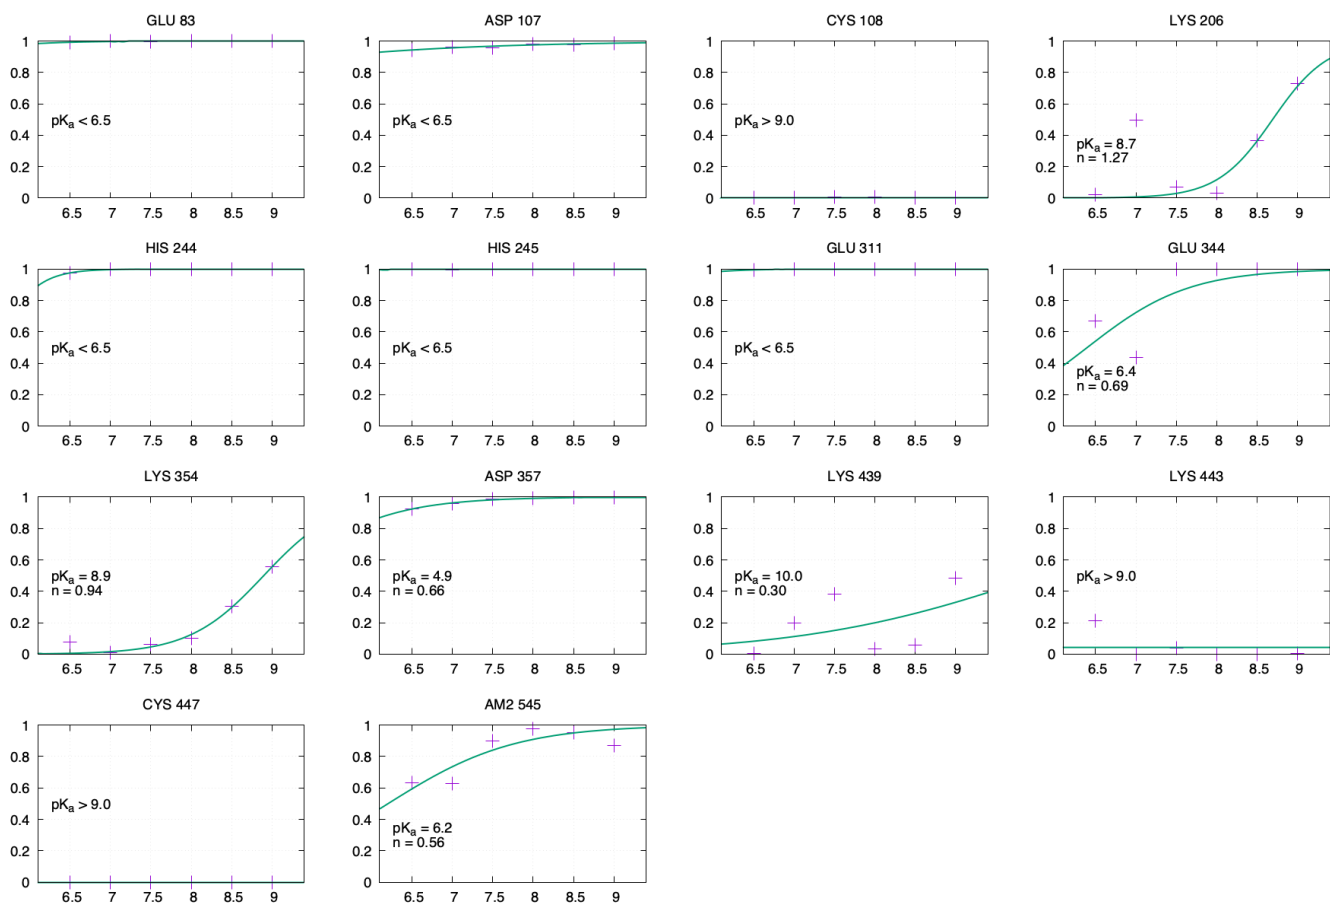

Figure S13: AMP1 (indicated as AM2) + methoxy-keto (not titrating)

## 4 CpHMD trajectory analysis: correlations between protonation microstates

Below are reported plots of individual protonation states of a subset of titrating residues, for each considered pH trajectory. Blue: positively charged; white: neutral; light red: negatively charged (-1); red: negatively charged (-2).

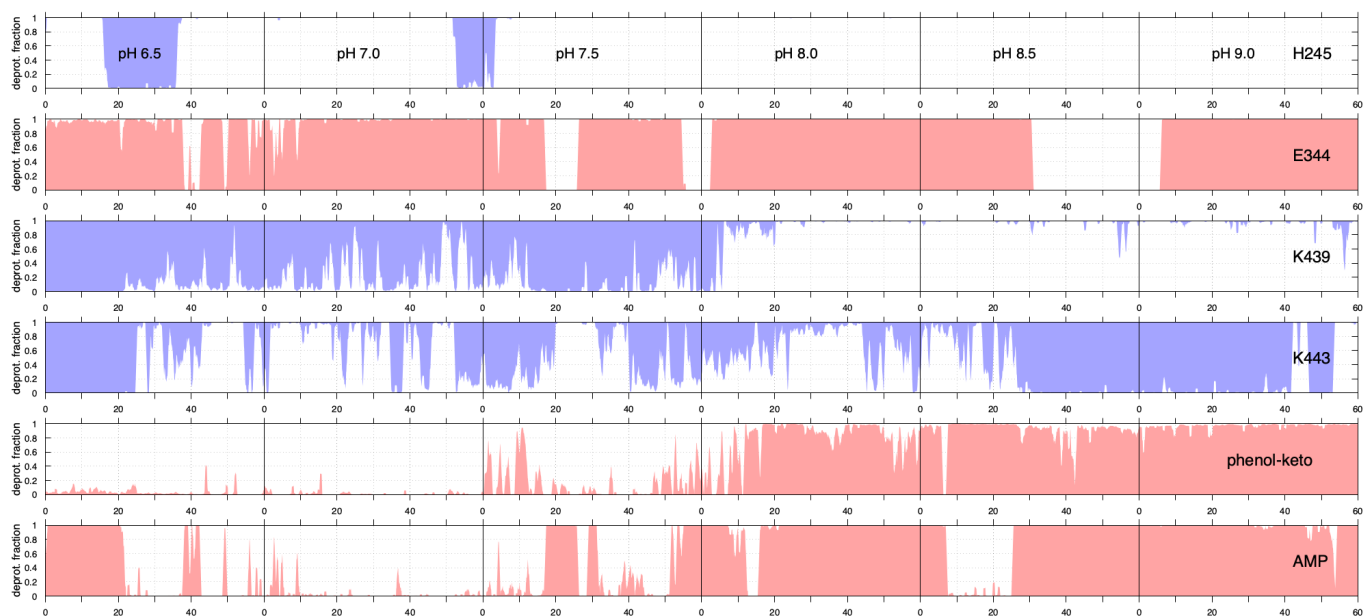

Figure S14: Phenol-Keto + AMP1

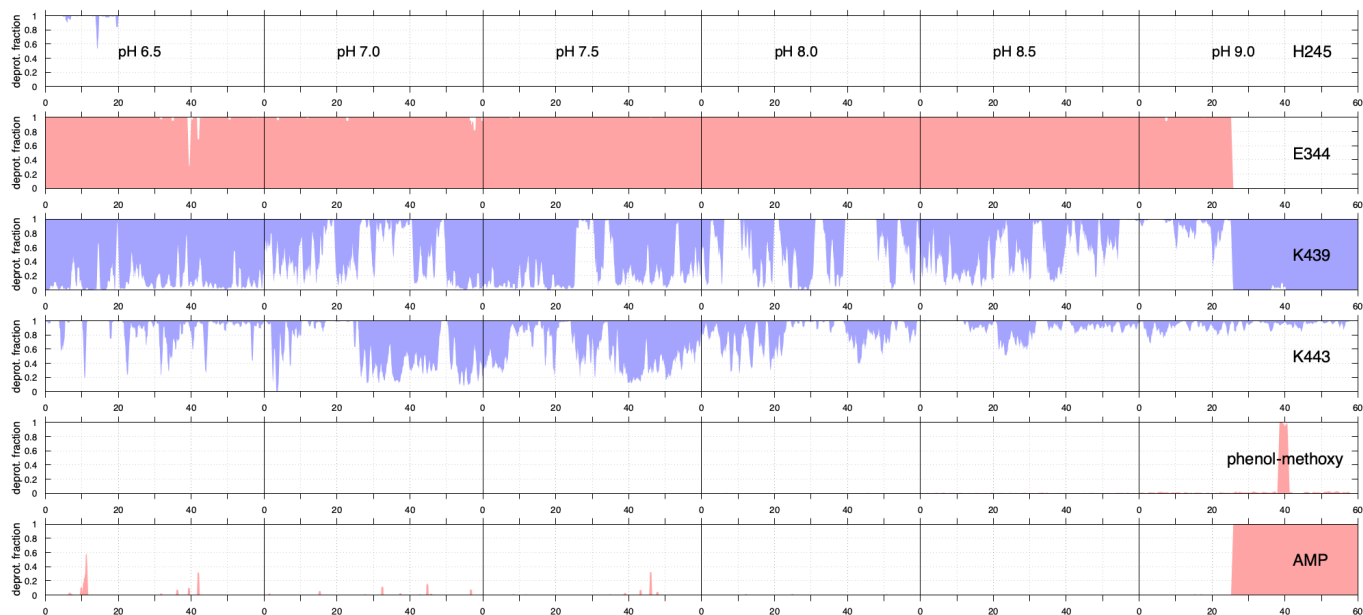

Figure S15: Phenol-methoxy + AMP1

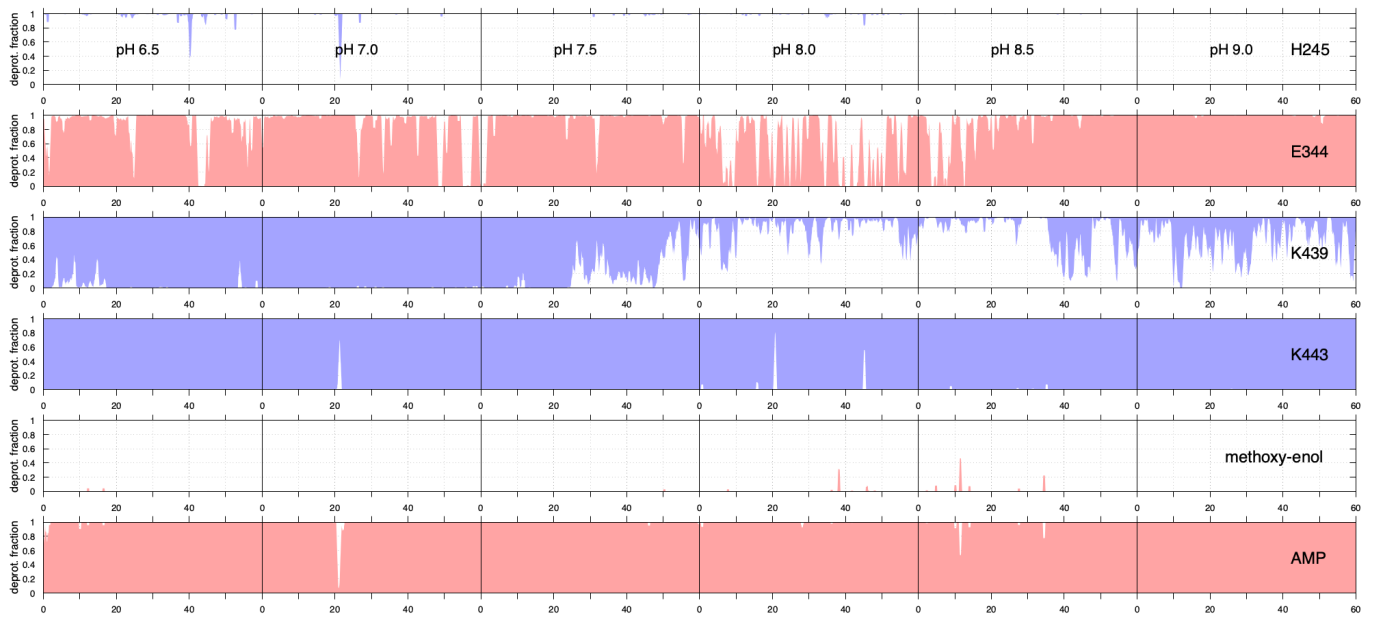

Figure S16: Methoxy-enol + AMP1

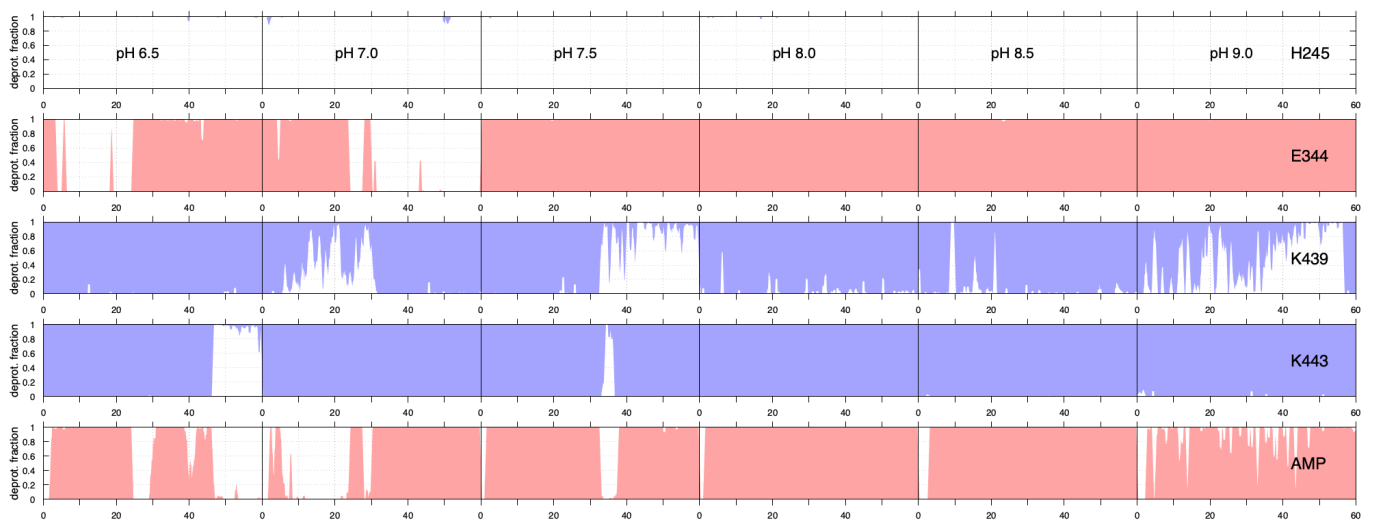

Figure S17: Methoxy-keto + AMP1

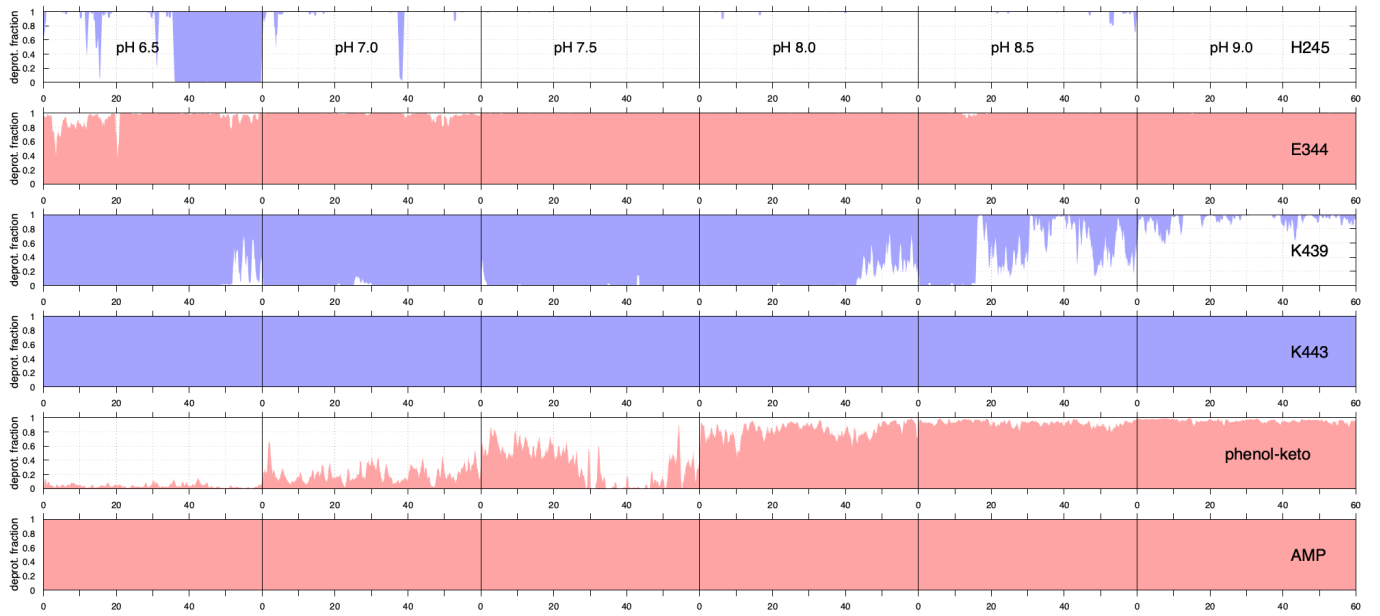

Figure S18: Phenol-keto + AMP2

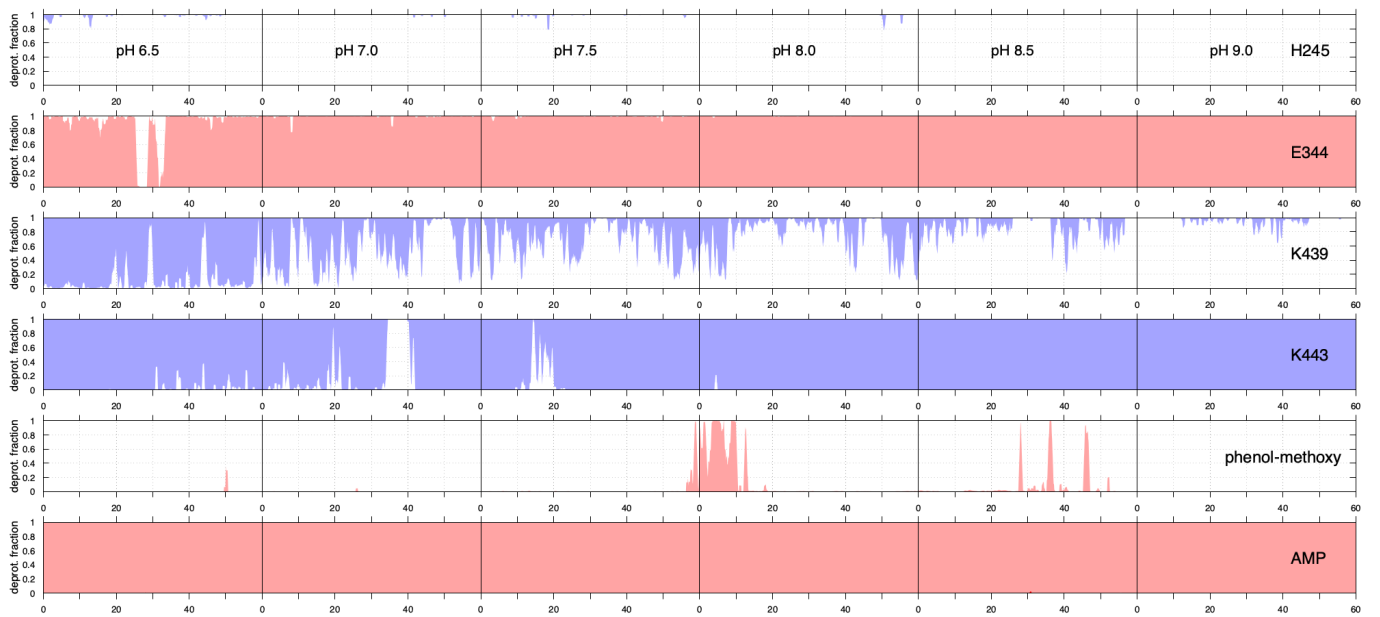

Figure S19: Phenol-methoxy + AMP2

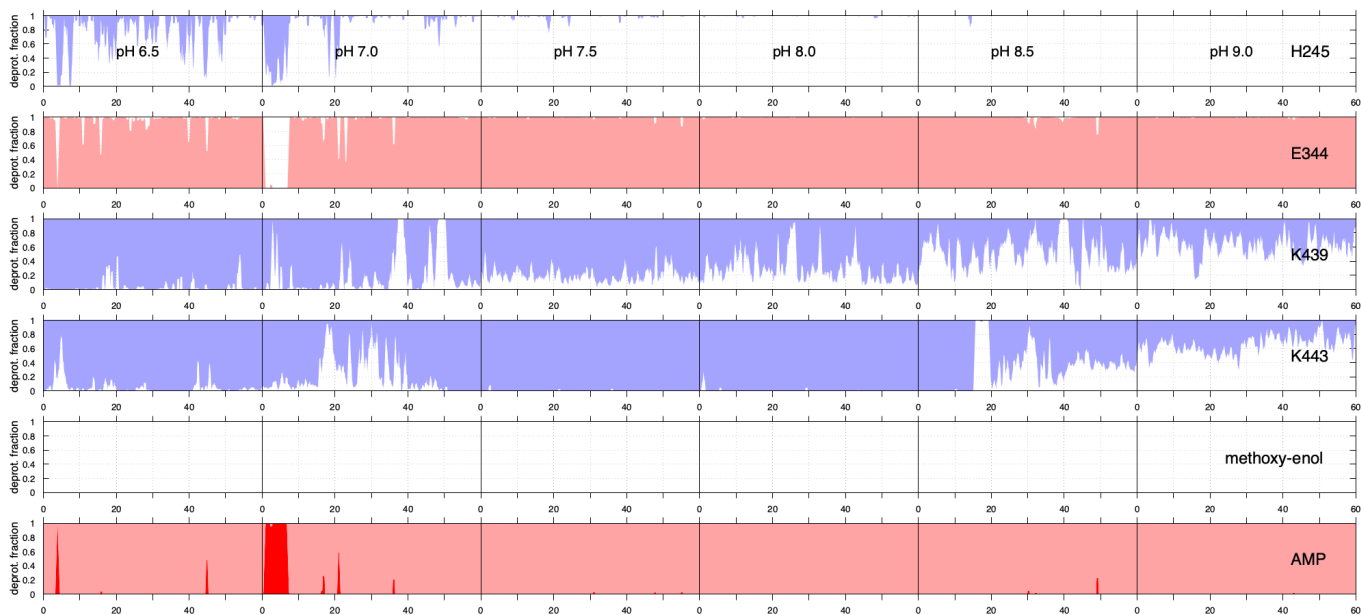

Figure S20: Methoxy-enol + AMP2



## 5 Analysis of the distance-based interactions between analogue, AMP and the most important residues.

From left to right: phenol-keto, phenol-methoxy, methoxy-enol, methoxy-keto. The radius of each circle is inversely proportional to the average distance between the selected amino-acid titratable atom and the considered AMP/analogue heavy atom. The color scale corresponds to the distance standard deviation (scale bar at the bottom of each Figure).

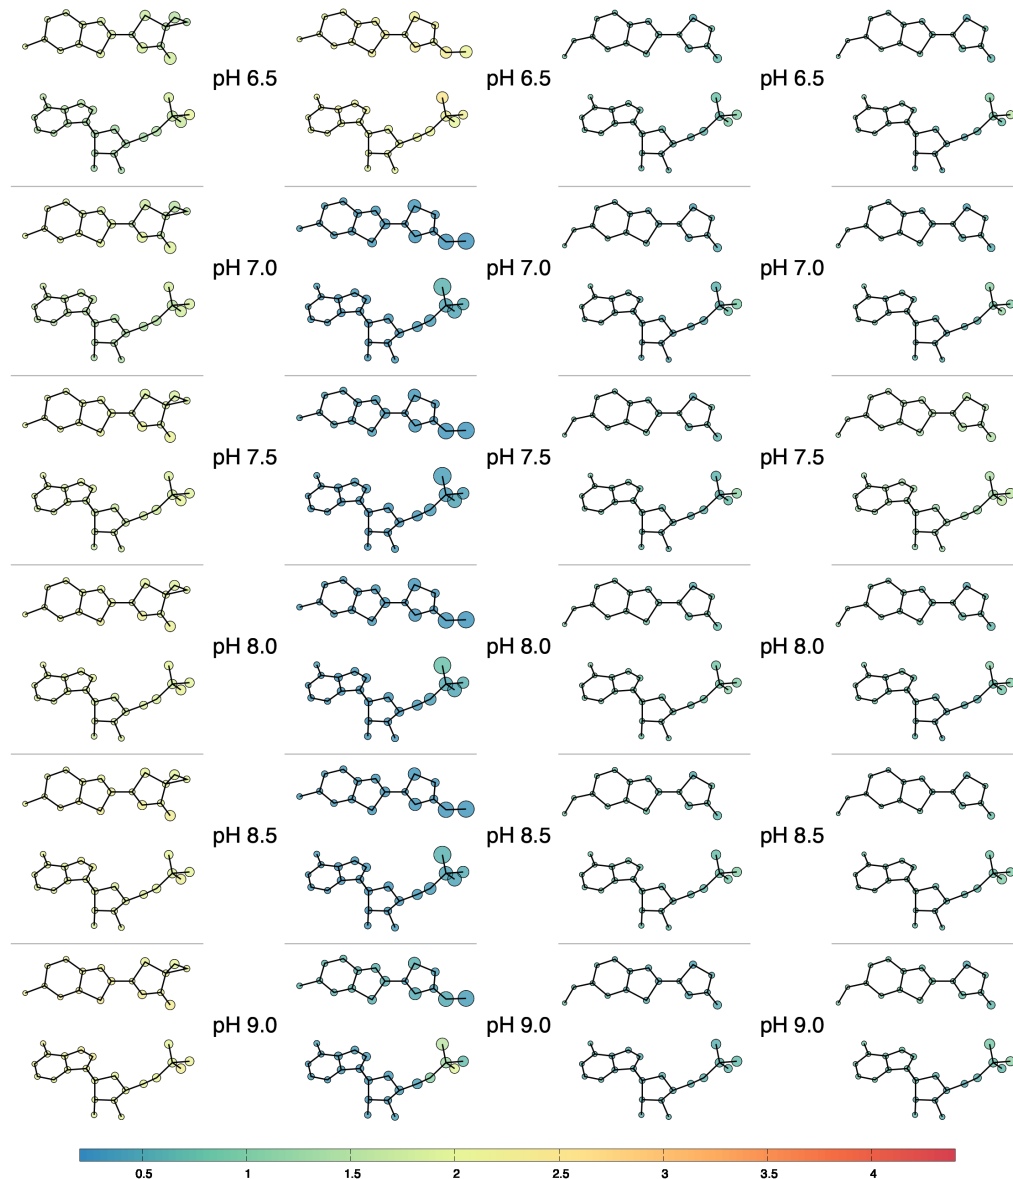

Figure S21: Distance distribution between analogue/AMP1 and residue H245

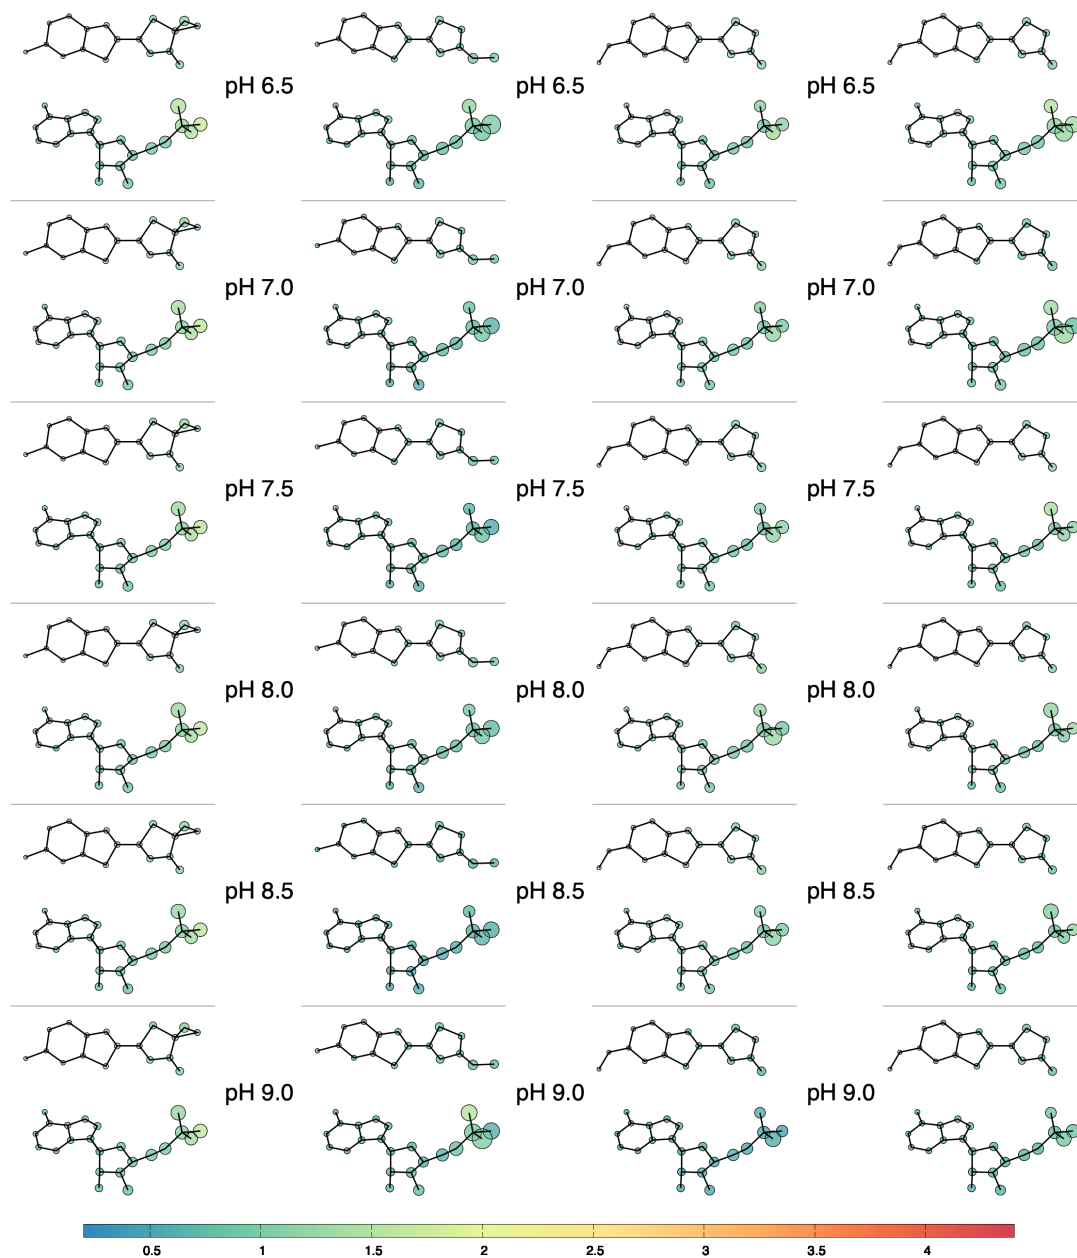

Figure S22: Distance distribution between analogue/AMP1 and residue E344

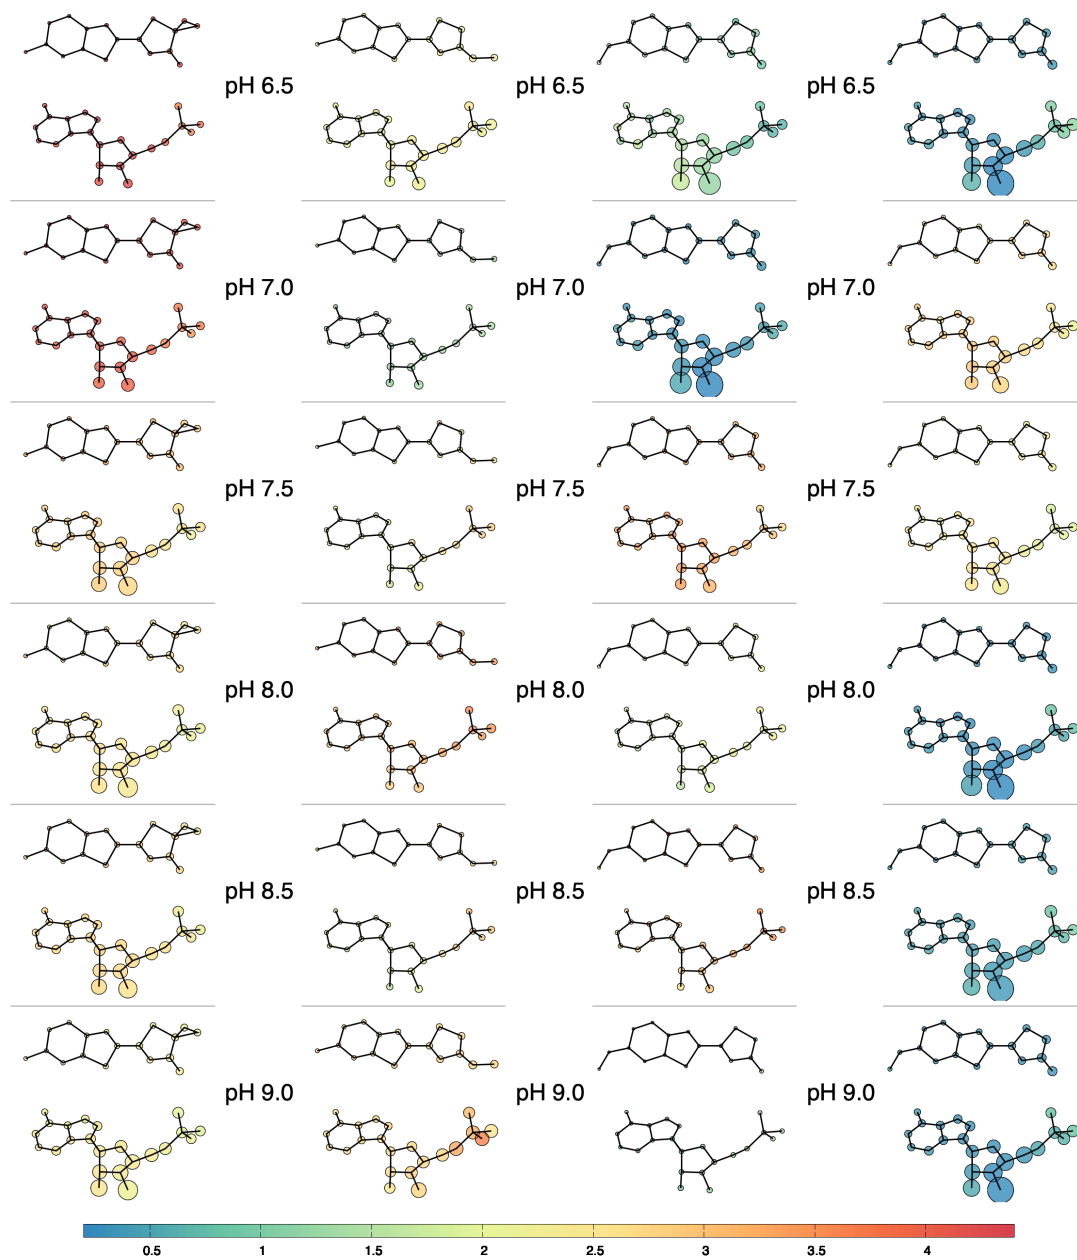

Figure S23: Distance distribution between analogue/AMP1 and residue K439

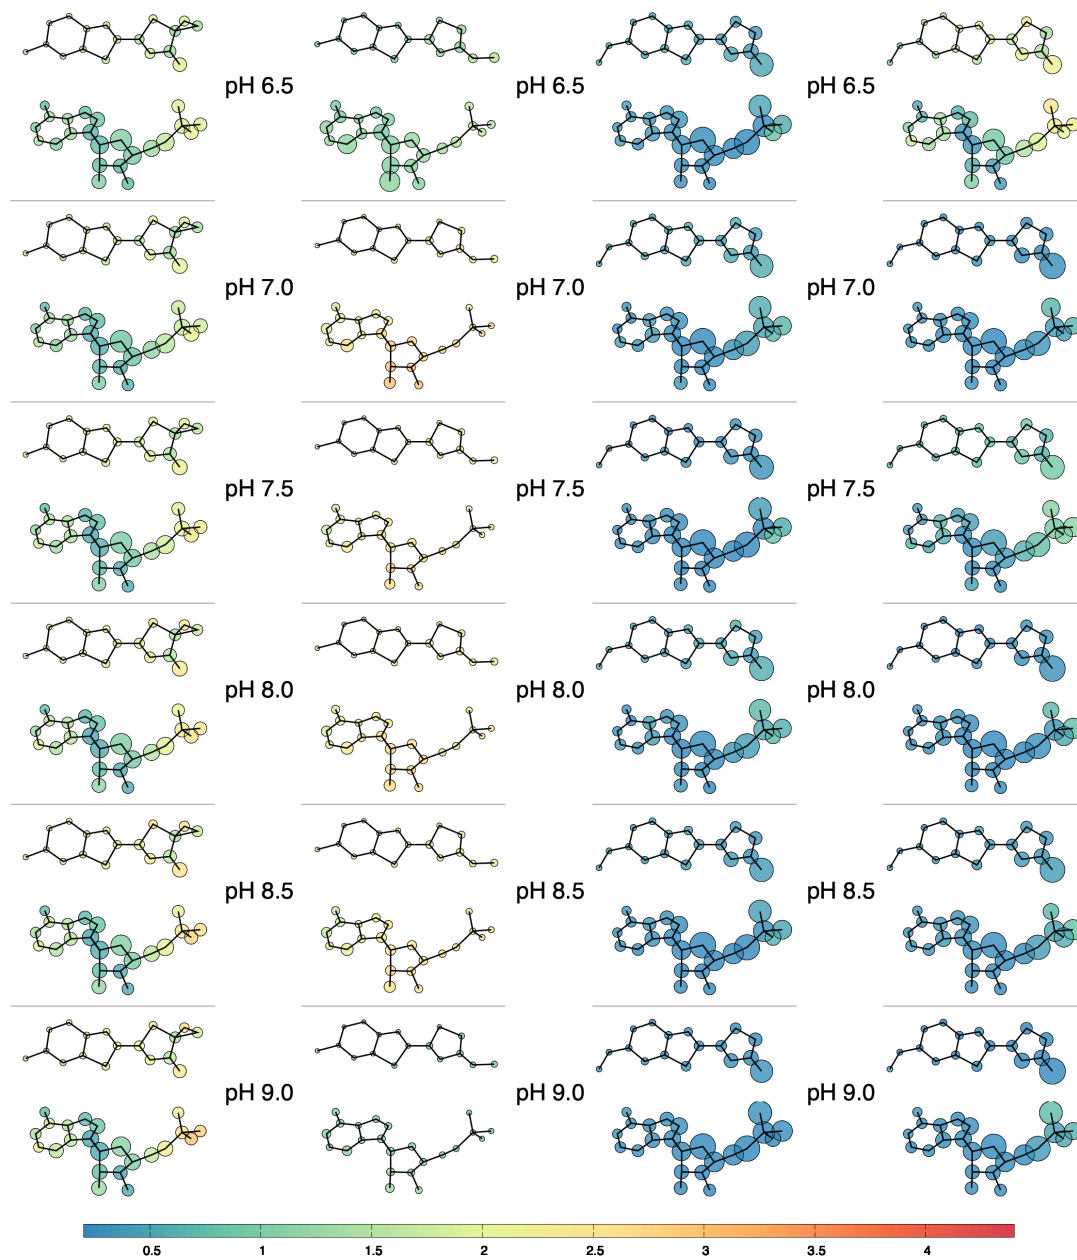

Figure S24: Distance distribution between analogue/AMP1 and residue K443

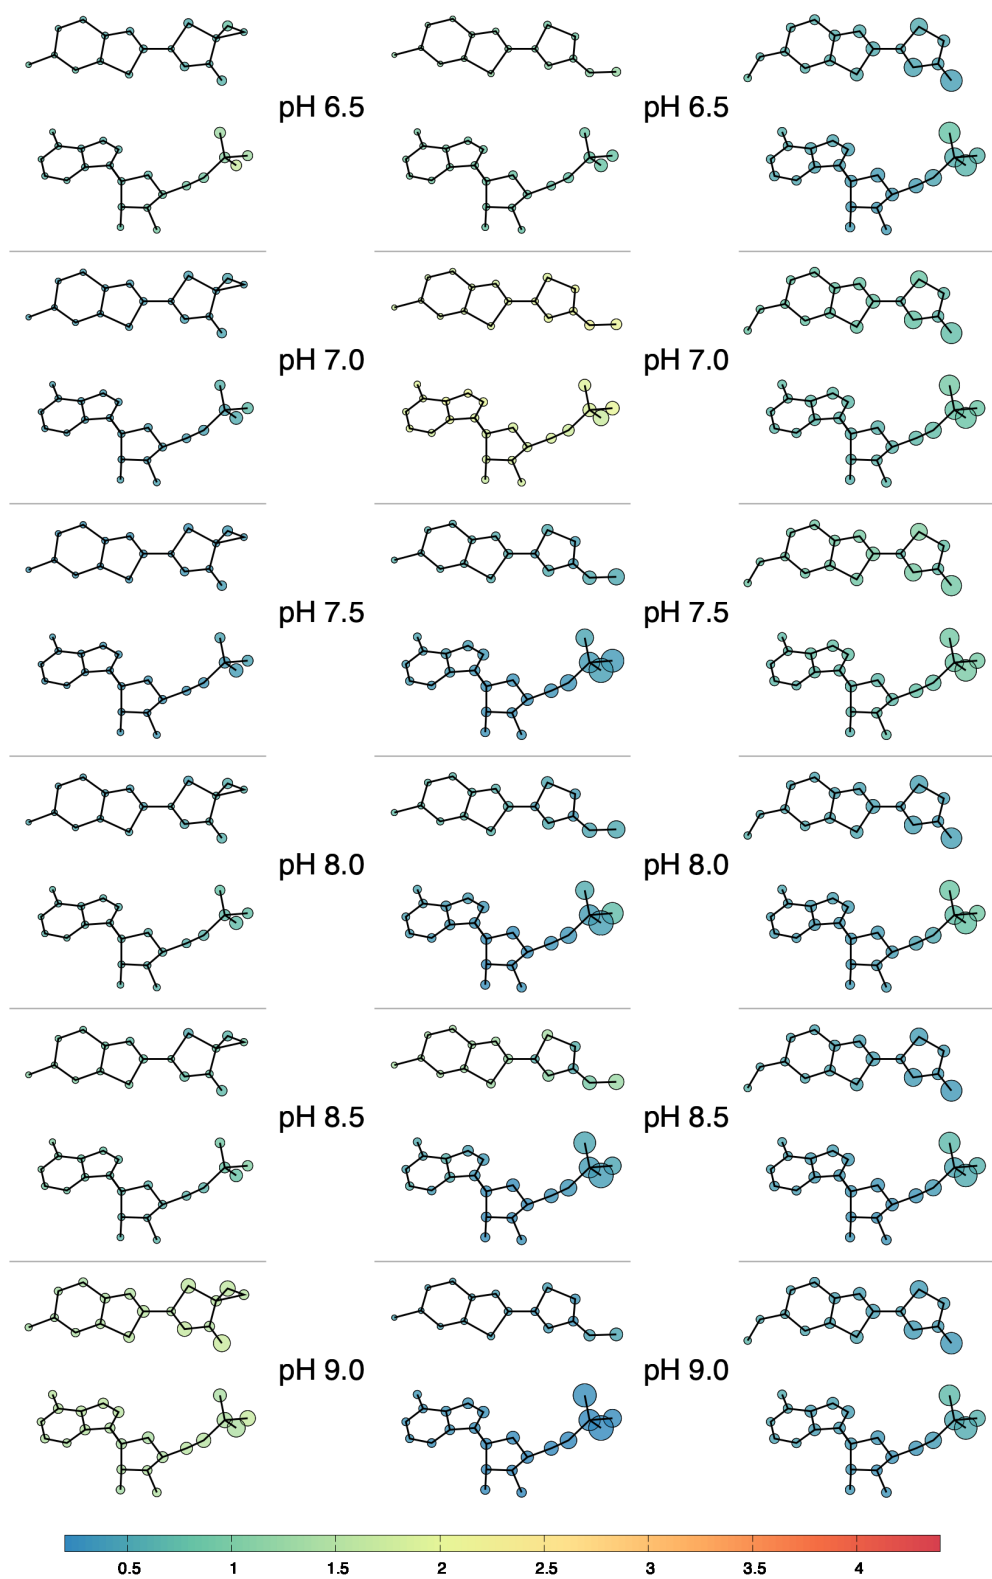

Figure S25: Distance distribution between analogue/AMP2 and residue H245

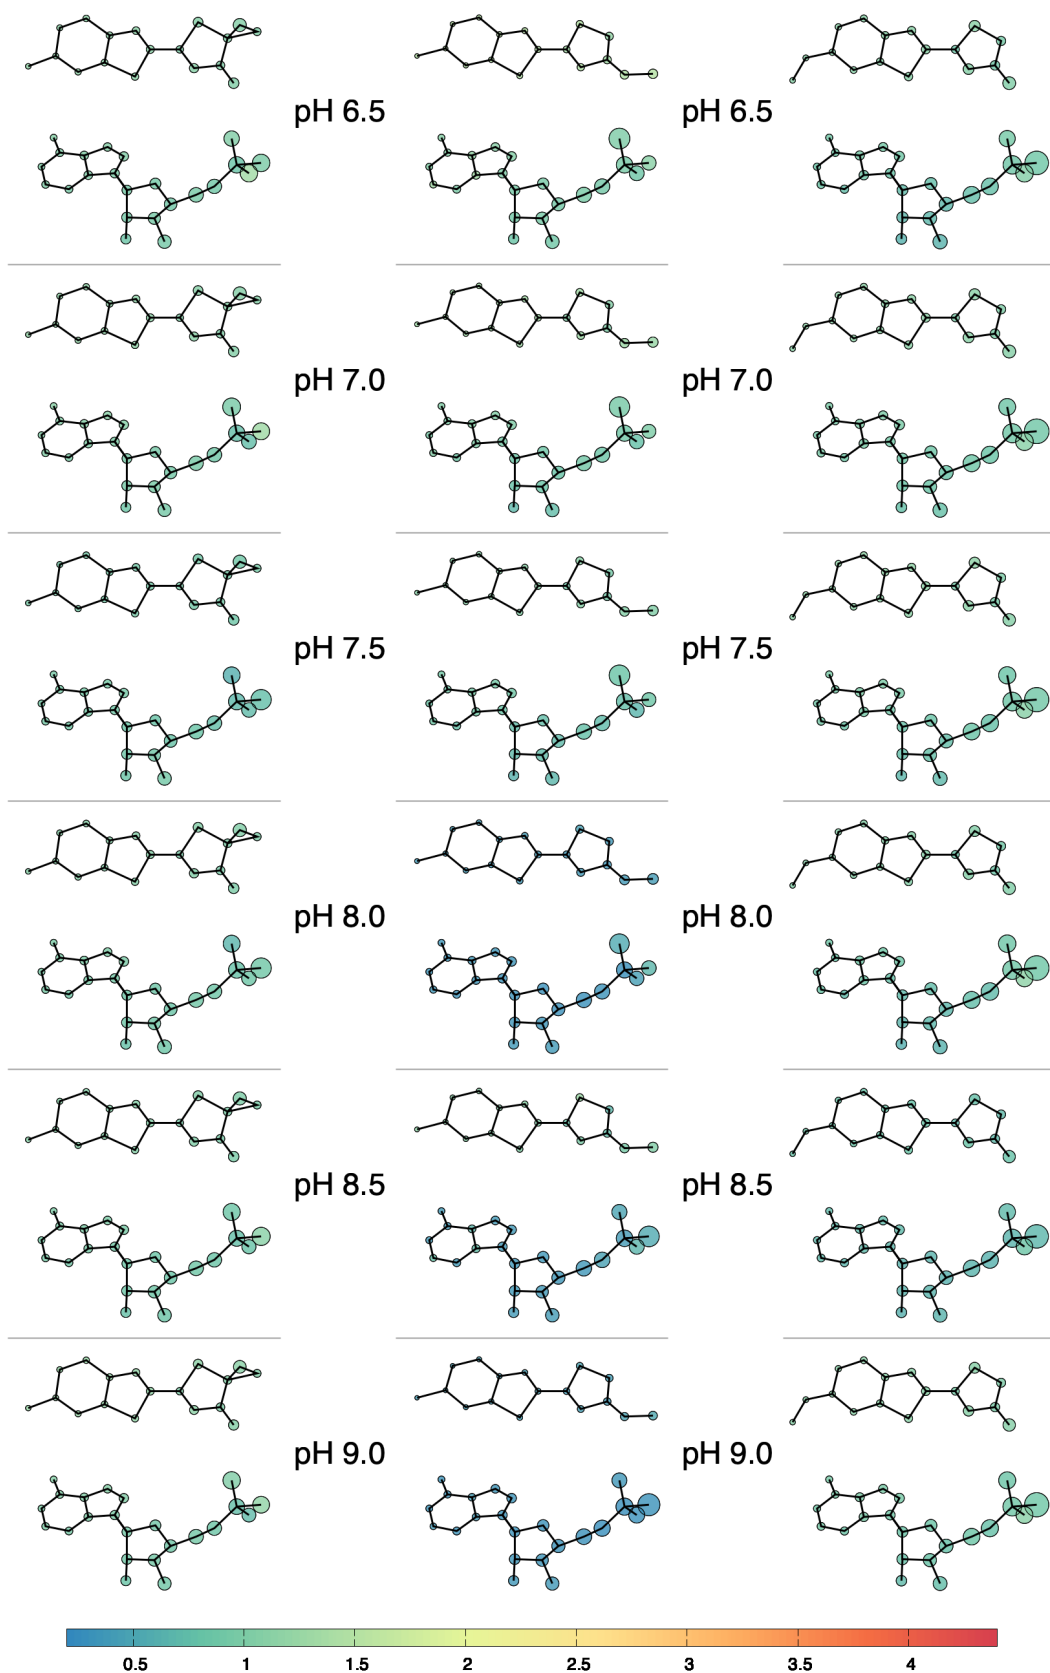

Figure S26: Distance distribution between analogue/AMP2 and residue E344

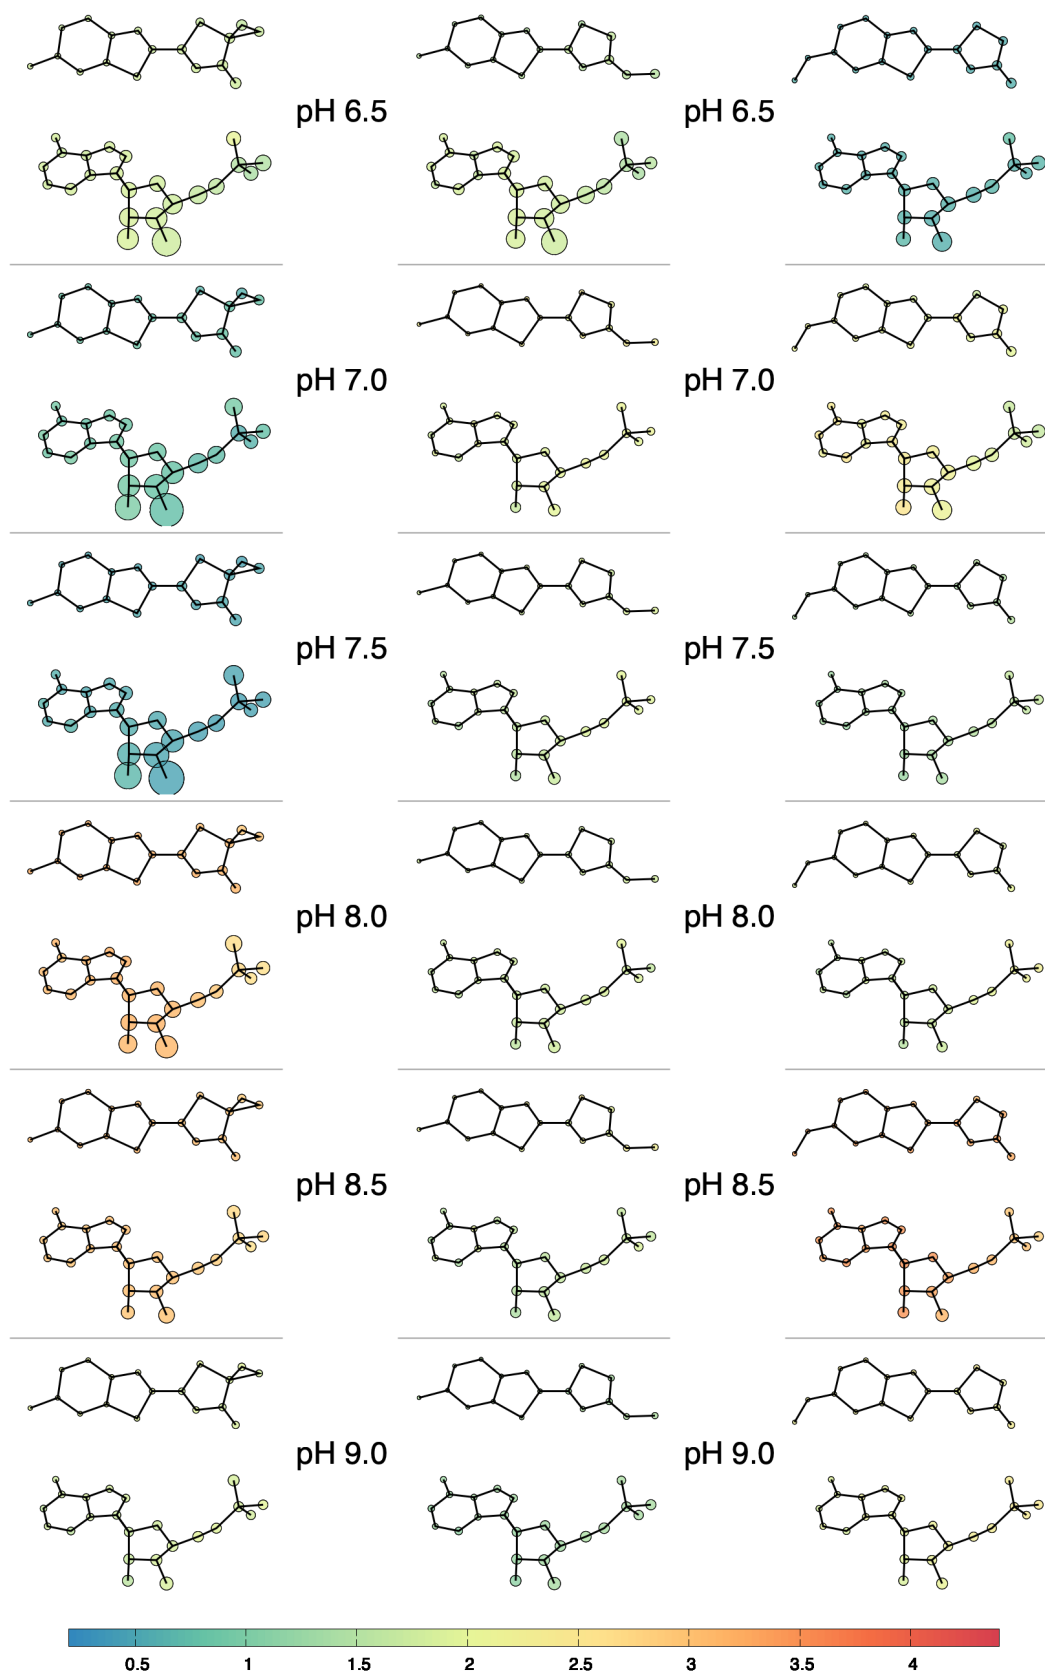

Figure S27: Distance distribution between analogue/AMP2 and residue K439

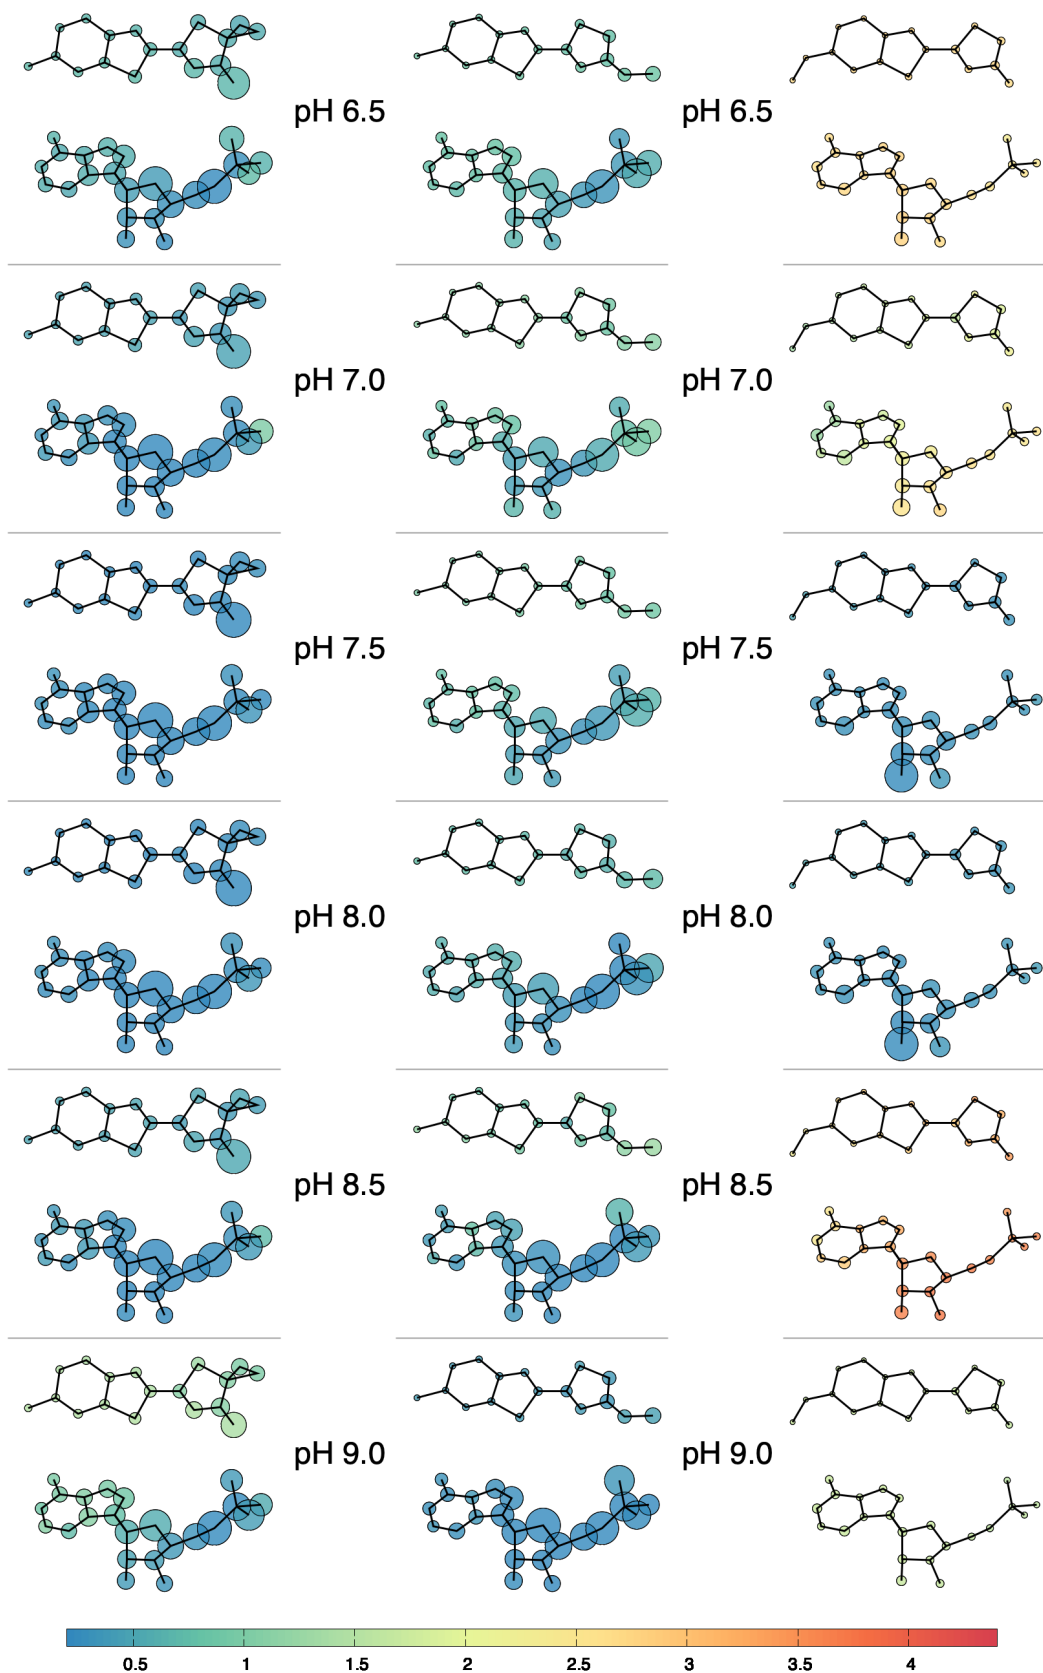

Figure S28: Distance distribution between analogue/AMP2 and residue K443



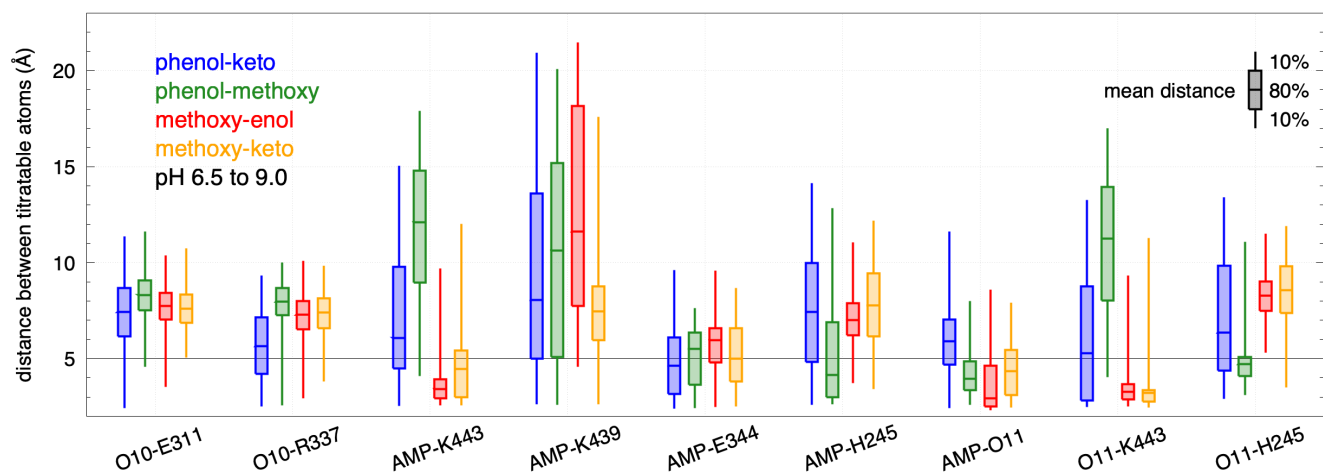

Figure S29: Candle plot of the distance distributions. Rectangles correspond to 80% of the distribution. Lines above and below show the tails of each distribution. Mean distances are also reported in each rectangle. A horizontal line at 5 Å, corresponding to the cutoff value used in the main analysis, is included for a better comparison with the main text. For each analogue, O11 (resp. O10) indicate the oxygen atom close to (resp. far from) AMP.

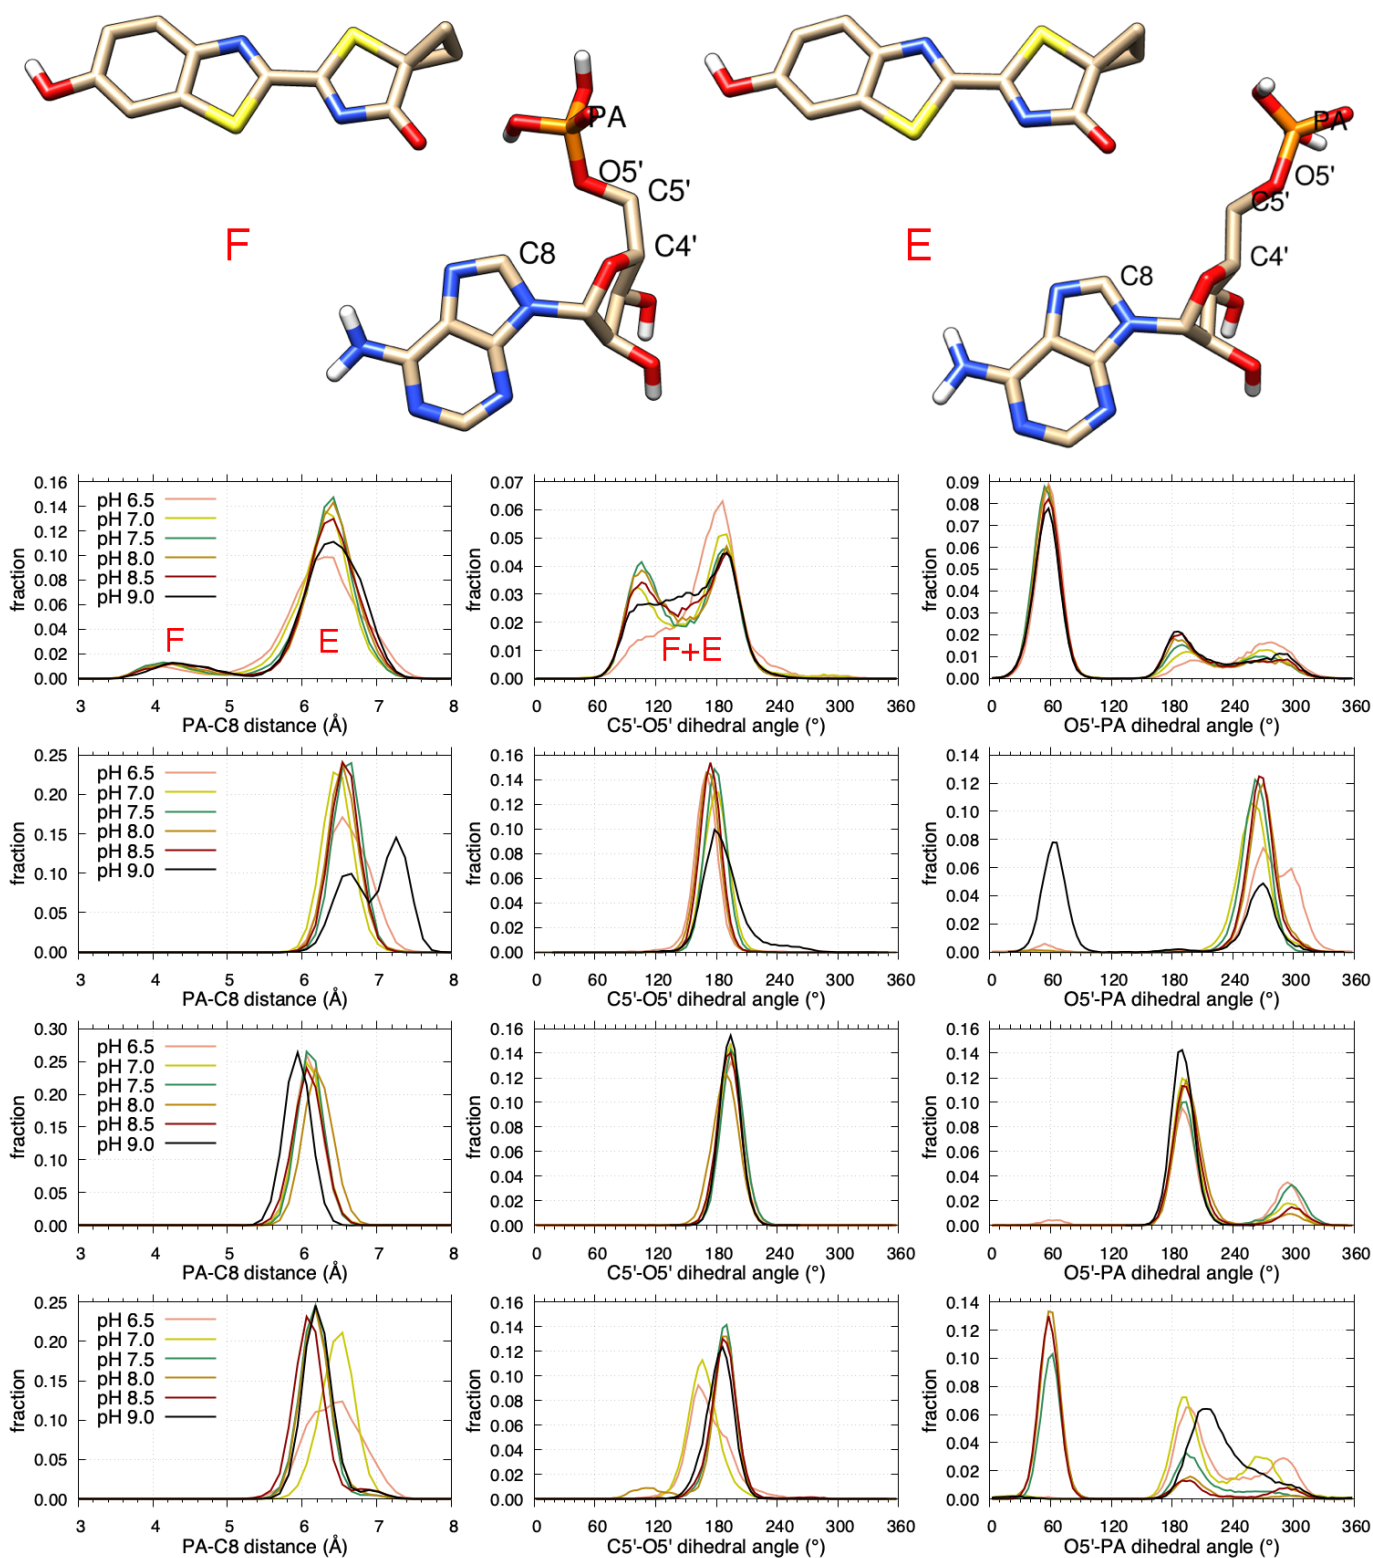

Figure S30: Normalized distribution of C8-PA AMP distances (in Å), C5'-O5' dihedral angle (in degree) and O5'-PA dihedral angle (in degree). From top to bottom: phenol-keto, phenol-methoxy, methoxy-enol, methoxy-keto. The phenol-keto distance distribution reveals two conformers: a folded one (F) and an extended one (E). The transition from one conformer to the other is driven by a rotation around the O5'-PA bond. The uni-modal to tri-modal distribution associated to the rotation around the O5'-PA bond reveals analogue-dependent and pH-dependent steric hindrance near the AMP phosphate group.

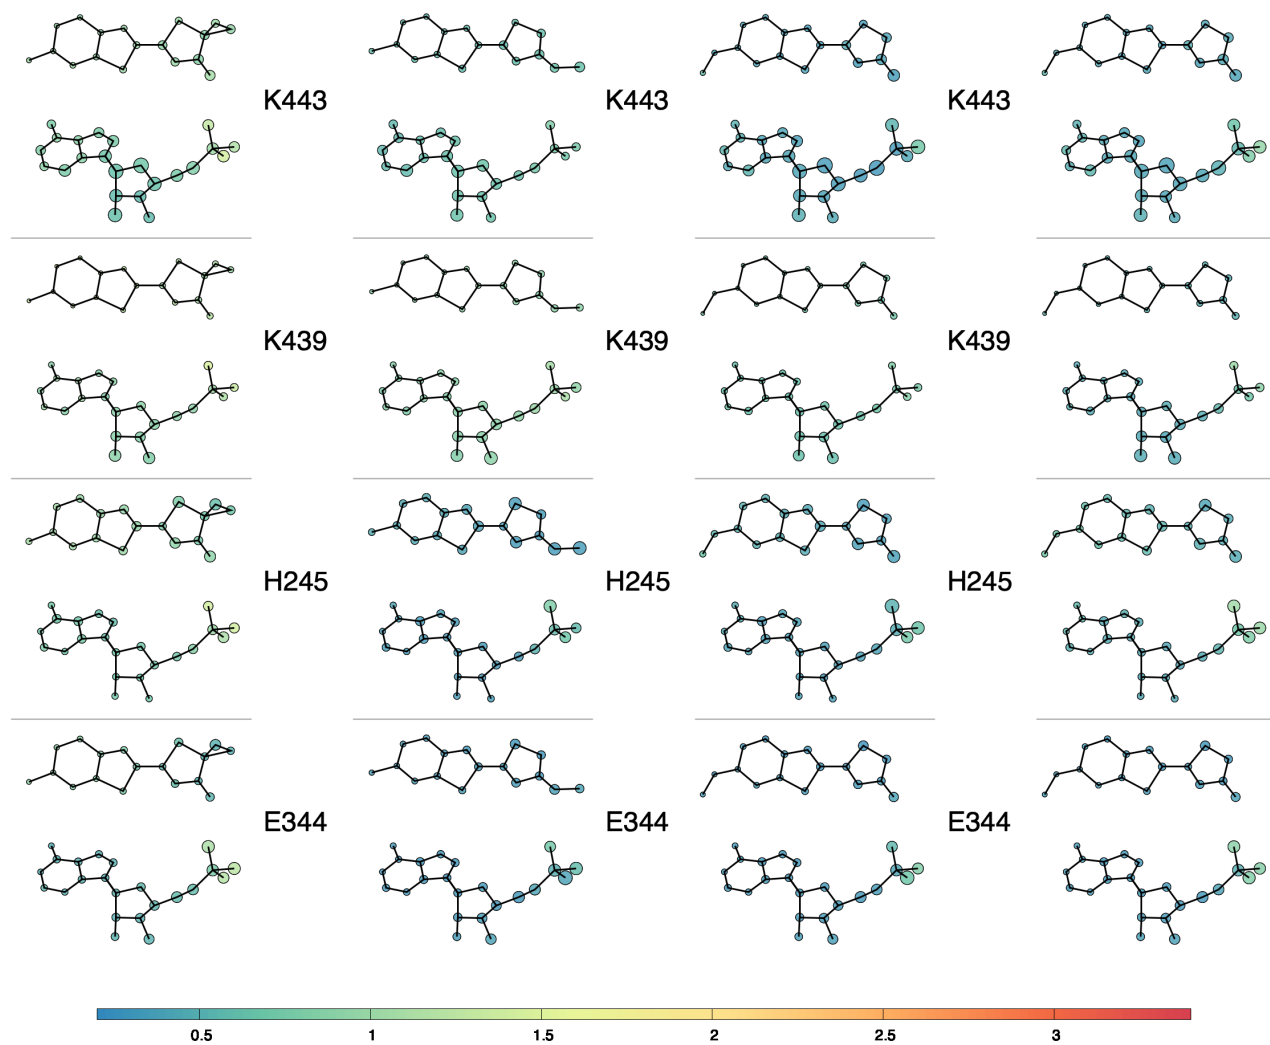

Figure S31: Analysis of the contacts between  $C_{\beta}$  of selected residues defining the luciferase cavity, and the analogue and AMP atoms.

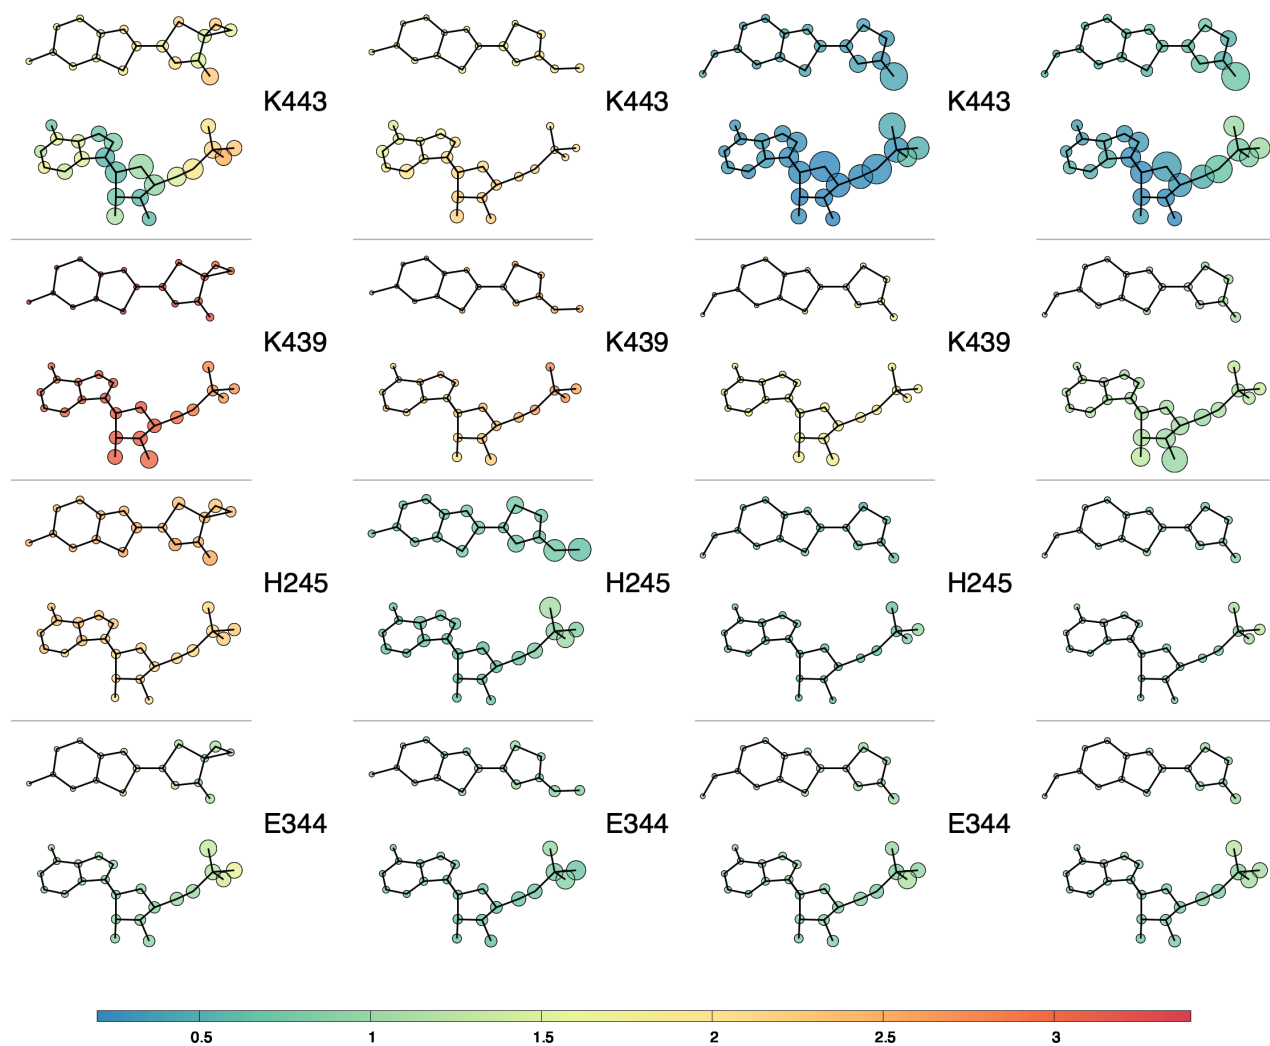

Figure S32: Analysis of the contacts between side-chain terminal atoms of selected residues defining the luciferase cavity, and the analogue and AMP atoms.

## 6 TDDFT spectrum for phenol-keto analogue in acidic conditions

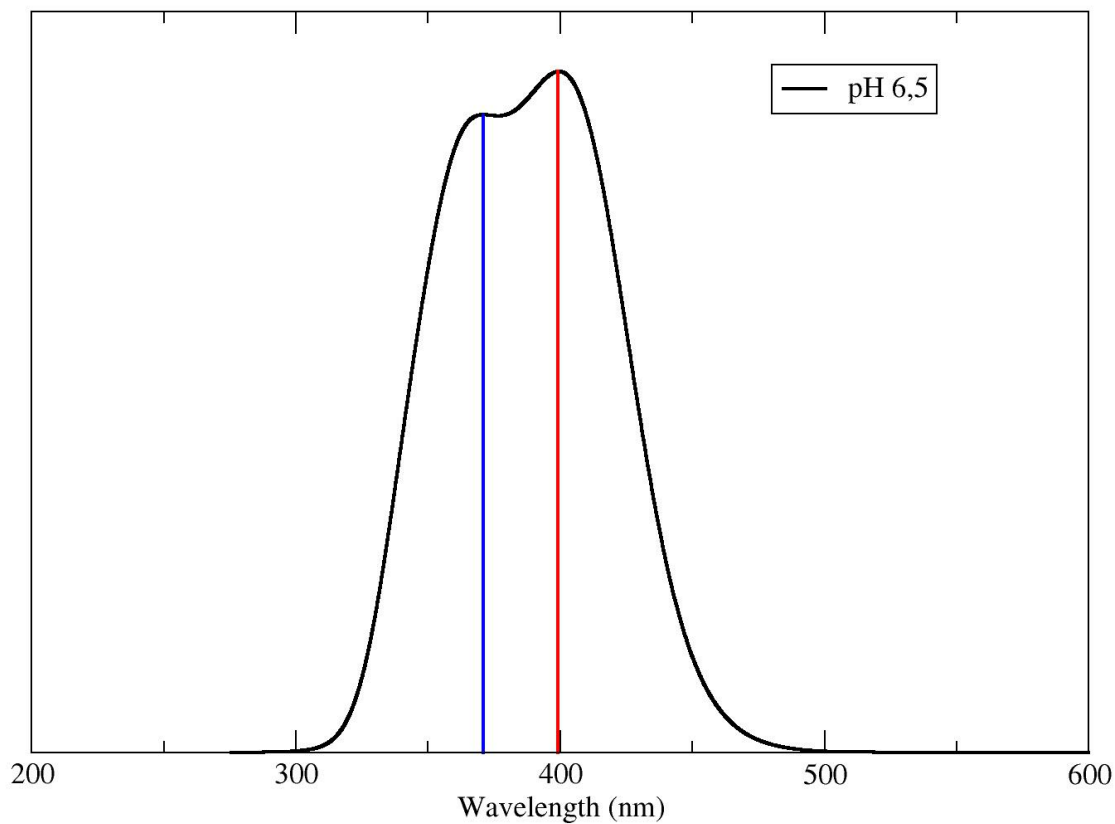

Figure S33: Absorption spectrum of the phenol-keto analogue in luciferase, at pH=6.5, using 1000 structures extracted from the corresponding CpHMD trajectory. Sticks indicate the average maximum absorption wavelengths.
